1 **Neighbor GWAS: incorporating neighbor genotypic identity into genome-**  
2 **wide association studies of field herbivory on *Arabidopsis thaliana***

3  
4 Yasuhiro Sato<sup>1,2</sup>, Eiji Yamamoto<sup>1,3</sup>, Kentaro K. Shimizu<sup>4,5\*</sup>, Atsushi J. Nagano<sup>6\*</sup>

5  
6 <sup>1</sup>PRESTO, Japan Science and Technology Agency, Kawaguchi 332-0012, Japan

7 <sup>2</sup>Research Institute for Food and Agriculture, Ryukoku University, Yokotani 1-5, Seta Oe-  
8 cho, Otsu, Shiga 520-2194, Japan

9 <sup>3</sup>Kazusa DNA Research Institute, Kazusa-kamatari 2-6-7, Kisarazu, Chiba 292-0818, Japan

10 <sup>4</sup>Department of Evolutionary Biology and Environmental Studies, University of Zurich,  
11 Winterthurerstrasse 190, 8057 Zurich, Switzerland

12 <sup>5</sup>Kihara Institute for Biological Research, Yokohama City University, 641-12 Maioka, 244-  
13 0813 Totsuka-ward, Yokohama, Japan

14 <sup>6</sup>Department of Plant Life Sciences, Faculty of Agriculture, Ryukoku University, Yokotani 1-  
15 5, Seta Oe-cho, Otsu, Shiga 520-2194, Japan

16 \*Co-correspondence:

17 Atsushi J. Nagano

18 [anagano@agr.ryukoku.ac.jp](mailto:anagano@agr.ryukoku.ac.jp)

19 Kentaro K. Shimizu

20 [kentaro.shimizu@ieu.uzh.ch](mailto:kentaro.shimizu@ieu.uzh.ch)

21

22

23

24

25 **ABSTRACT**

26 An increasing number of field studies show that the phenotype of an individual plant depends  
27 not only on its genotype but also on those of neighboring plants; however, this fact is not  
28 taken into consideration in genome-wide association studies (GWAS). Based on the Ising  
29 model of ferromagnetism, we incorporated neighbor genotypic identity into a regression  
30 model in this study. The proposed method, named “neighbor GWAS”, was applied to  
31 simulated and real phenotypes using *Arabidopsis thaliana* accessions. Our simulations  
32 showed that phenotypic variation explained by neighbor effects approached a plateau when  
33 an effective spatial scale became narrow. Thus, the effective scale of neighbor effects could  
34 be estimated by patterns of the phenotypic variation explained. The power to detect causal  
35 variants of neighbor effects was moderate to strong when a trait was governed by tens of  
36 variants. In contrast, there was a reasonable power down when hundreds of variants underlay  
37 a single trait. We applied the neighbor GWAS to field herbivory data on 200 accessions of *A.*  
38 *thaliana*, and found that the neighbor effects more largely contributed to the observed  
39 damage variation than self-genotype effects. Interestingly, several defensin family genes were  
40 associated with neighbor effects on the herbivory, while self-genotype effects were related to  
41 flavin-monooxygenase glucosinolate S-oxygenase 2 (FMO GS-OX2). Overall, the neighbor  
42 GWAS highlights the overlooked but significant role of plant neighborhood effects in shaping  
43 phenotypic variation, thereby providing a novel and powerful tool to dissect complex traits in  
44 spatially structured environments.

45

46 **Keywords:** *Arabidopsis thaliana*, GWAS, Ising model, Neighbor effects, Plant-insect  
47 interaction

48

## 49 INTRODUCTION

50 Plants are immobile and thus cannot escape their neighbors. In natural and agricultural fields,  
51 individual phenotypes depend not only on the plants' own genotype but also on those of other  
52 plants in a neighborhood (Tahvanainen and Root 1972; Barbosa et al. 2009; Underwood et al.  
53 2014). This phenomenon has been termed neighbor effects or associational effects in plant  
54 ecology (Barbosa et al. 2009; Underwood et al. 2014; Sato 2018). Such neighbor effects were  
55 initially reported as a form of interspecific interaction among different plant species  
56 (Tahvanainen and Root 1972), but many studies have thus far illustrated that neighbor effects  
57 occur among different genotypes within a plant species in herbivory (Schuman et al. 2015;  
58 Sato 2018; Ida et al. 2018), pathogen infections (Mundt 2002; Zeller et al. 2012), and  
59 pollinator visitations (Genung et al. 2012). Although neighbor effects are of considerable  
60 interest in plant science (Dicke and Baldwin 2010; Erb 2018) and its potential application to  
61 agriculture (Zeller et al. 2012; Dahlin et al. 2018), these effects are not often considered in  
62 quantitative genetics of field-grown plants.

63         Complex mechanisms underlie neighbor effects through direct competition (Weiner  
64 1990), herbivore and pollinator movement (Bergvall et al. 2006; Genung et al. 2012; Verschut  
65 et al. 2016), and volatile communication among plants (Schuman et al. 2015; Dahlin et al.  
66 2018). For example, lipoxygenase (*LOX*) genes govern jasmonate-mediated volatile  
67 emissions that induce defenses of neighboring plants in *Nicotiana* (Schuman et al. 2015).  
68 Even if direct plant-plant communications are absent, herbivores can mediate indirect  
69 interactions between plant genotypes (Sato and Kudoh 2017; Ida et al. 2018): *GLABRA1*  
70 (*GLI*) polymorphism determines hairy or glabrous phenotypes in *Arabidopsis* plants (Hauser  
71 et al. 2001) and allow a flightless leaf beetle to avoid hairy plants when encountered at a low  
72 frequency (Sato and Kudoh 2017; Sato et al. 2017). Yet, there are few hypothesis-free

73 approaches to seek key genetic variants responsible for plant neighborhood effects.

74           Genome-wide association studies (GWAS) have been increasingly adopted to  
75 resolve the genetic architecture of complex traits in the model plant, *Arabidopsis thaliana*  
76 (Atwell et al. 2010; Togninalli 2018) and crop species (Hamblin et al. 2011). Plant  
77 interactions with herbivores (Brachi et al. 2015; Nallu et al. 2018), microbes (Horton et al.  
78 2014; Wang et al. 2018), and other plant species (Frachon et al. 2019), are one of such  
79 complex traits dissected through the lens of GWAS. To distinguish causal variants from the  
80 genome structure, GWAS often employs a linear mixed model with kinship considered in a  
81 random effect (Kang et al. 2008; Korte and Farlow 2013). However, it is generally impossible  
82 to test all the gene-by-gene interactions due to combinatorial explosion (Gondro et al. 2013);  
83 thus, some feasible and reasonable approach should be invented for GWAS of neighbor  
84 effects.

85           To incorporate neighbor effects into GWAS, we focused on a theoretical model of  
86 neighbor effects in a magnetic field, known as the Ising model (Ising 1925; McCoy and  
87 Maillard 2012), which has been applied to forest gap dynamics and community assembly in  
88 plant ecology (Kizaki and Katori 1999; Schlicht and Iwasa 2004; Azaele et al. 2010).  
89 Assuming that an individual plant is a magnet, two alleles at each locus correspond to the  
90 north or south dipole, whereby genome-wide multiple testing across all loci is analogous to a  
91 number of parallel two-dimensional layers. The Ising model has a clear advantage in its  
92 interpretability, such that (i) the optimization problem for a population sum of trait values can  
93 be regarded as an inverse problem of a simple linear model, (ii) the sign of neighbor effects  
94 determines a model trend to generate a clustered or checkered spatial pattern of the two  
95 states, and (iii) the self-genotypic effect determines the general tendency to favor one allele  
96 over another (Fig. 1).

97 In this study, we proposed a new methodology integrating GWAS and the Ising  
98 model, named “neighbor GWAS”. The method was applied to simulated phenotypes and real  
99 data of field herbivory on *A. thaliana*. We addressed two specific questions: (i) what spatial  
100 and genetic factors influenced the power to detect causal variants? (ii) were neighbor effects  
101 significant sources of leaf damage variation in field-grown *A. thaliana*? Based on the  
102 simulation and application, we determined the feasibility of our approach to detect neighbor  
103 effects in field-grown plants.

104

## 105 MATERIALS & METHODS

106

### 107 Neighbor GWAS

108 **Basic model.** We analyzed neighbor effects in GWAS as an inverse problem of the two-  
109 dimensional Ising model (Fig. 1). We consider a situation where a plant accession has either  
110 of two alleles at each locus, and a number of accessions occupy a finite set of field sites in a  
111 two-dimensional lattice. Let  $x$  represent allelic status at each locus, the allelic status at each  
112 locus of the  $i$ -th focal plant and  $j$ -th neighboring plants can be designated as  $x_{i(j)} \in \{-1, +1\}$ .  
113 Based on a two-dimensional Ising model, we can define a phenotype value of  $i$ -th focal  
114 individual plant  $y_i$  as

$$115 \quad y_i = \beta_1 x_i + \beta_2 \sum_{j=1}^L x_i x_j \quad [\text{eq. 1}],$$

116 where  $\beta_1$  and  $\beta_2$  denote self-genotype and neighbor effects, respectively and  $L$  is the number  
117 of neighboring plants to refer. If two neighboring plants shared the same allele at a given  
118 locus, the product  $x_i x_j$  turned into  $(-1) \times (-1) = +1$  or  $(+1) \times (+1) = +1$ . If two neighbors had  
119 different alleles, the product  $x_i x_j$  became  $(-1) \times (+1) = -1$  or  $(+1) \times (-1) = -1$ . Accordingly, the  
120 effects of neighbor genotypic identity on a phenotype depended on the coefficient  $\beta_2$  and the

121 number of two alleles in a neighborhood. If the numbers of identical and different alleles  
122 were the same near a focal plant, these neighbors offset the sum of the products  $\sum_{j=1}^L x_i x_j$  and  
123 exerted no effects on a phenotype. When we summed up the phenotype values for the total  
124 number of plants  $n$  and replaced it as  $E = -\beta_2$ ,  $H = -\beta_1$  and  $\epsilon_i = \sum y_i$ , eq. 1 can be transformed  
125 as  $\epsilon_i = -E \sum_{\langle i,j \rangle} x_i x_j - H \sum x_i$ , which defines the interaction energy of a two-dimensional  
126 ferromagnetic Ising model (McCoy and Maillard 2012). The neighbor effect  $\beta_2$  and self-  
127 genotype effect  $\beta_1$  were interpreted as the energy coefficient  $E$  and external magnetic field  $H$ ,  
128 respectively. An individual plant represented a spin and the two allelic states of each locus  
129 corresponded to a north or south dipole. The positive or negative value of  $\sum x_i x_j$  indicated a  
130 ferromagnetism or paramagnetism, respectively. In this study, we did not consider the effects  
131 of allele dominance because this model was applied to inbred *A. thaliana*. However,  
132 heterozygotes could be processed if the neighbor covariate  $x_i x_j$  was weighted by an estimated  
133 degree of dominance in the self-genotypic effects on a phenotype.

134 **Mixed model.** For association mapping, we needed to determine  $\beta_1$  and  $\beta_2$  from  
135 observed phenotypes and consider a confounding sample structure as advocated by previous  
136 GWAS (e.g., Kang et al. 2008; Korte and Farlow 2013). Extending the basic model eq. 1, we  
137 described a linear mixed model at an individual level as

$$138 \quad y_i = \beta_0 + \beta_1 x_i + \frac{\beta_2}{L} \sum_{j=1}^L x_i x_j + u_i + e_i \quad [\text{eq. 2}],$$

139 where  $\beta_0$  indicates the intercept, and the term  $\beta_1 x_i$  represents fixed self-genotype effects as  
140 tested in conventional GWAS;  $\beta_2$  is the coefficient of fixed neighbor effects, and the neighbor  
141 covariate  $\sum_{j=1}^L x_i x_j$  is scaled by the number of neighboring plants,  $L$ . Variance components  
142 due to a sample structure in self and neighbor effects was modeled by a random effect  
143  $u_i \sim \text{Norm}(0, \sigma_S^2 \mathbf{K}_S + \sigma_N^2 \mathbf{K}_N)$ . The residual was expressed as  $e_i \sim \text{Norm}(0, \sigma_e^2)$ .

144 The  $n \times n$  variance-covariance matrices represented the similarity in self-genotypes  
145 (i.e., kinship) and neighbor covariates among  $n$  individual plants as:

146 
$$\mathbf{K}_S = \frac{1}{(q-1)} \mathbf{X}_S^T \mathbf{X}_S \quad \text{and}$$

147 
$$\mathbf{K}_N = \frac{1}{q-1} \mathbf{X}_N^T \mathbf{X}_N,$$

148 where  $q$  indicates the number of markers. As we defined  $x_{i(j)} \in \{-1, +1\}$ , the elements of the  
149 kinship matrix  $\mathbf{K}_S$  are scaled to represent the proportion of marker loci shared among  $n \times n$   
150 plants such that  $\mathbf{K}_S = (0.5k_{S,ij} + 0.5)$  and  $k_{S,ij} \in [0, 1]$ ;  $\sigma_S^2$  and  $\sigma_N^2$  indicates variance  
151 component parameters for the self and neighbor effects.

152 The  $n$  plants  $\times$   $q$  markers matrix  $\mathbf{X}_S$  and  $\mathbf{X}_N$  are explanatory variables for the self  
153 and neighbor effects as  $\mathbf{X}_S = (x_i)$  and  $\mathbf{X}_N = \left( \frac{\sum_{j=1}^L x_i x_j}{L} \right)$ . The individual-level formula eq. 2 could  
154 also be converted into a conventional matrix form as:

155 
$$\mathbf{y} = \mathbf{X}\boldsymbol{\beta} + \mathbf{Z}\mathbf{u} + \mathbf{e} \quad [\text{eq. 3}],$$

156 where  $\mathbf{y}$  is  $n \times 1$  vector of phenotypes.  $\mathbf{X}$  is a matrix of fixed effects, including mean, self-  
157 genotype  $x_i$ , neighbor covariate  $(\sum_{j=1}^L x_i x_j)/L$ , and other confounding covariates for  $n$  plants;  
158  $\boldsymbol{\beta}$  is a vector that represents coefficients of the fixed effects;  $\mathbf{Z}$  is a design matrix allocating  
159 individuals to a genotype, and becomes an identity matrix if all plants are different  
160 accessions;  $\mathbf{u}$  is the random effect with  $\text{Var}(\mathbf{u}) = \sigma_S^2 \mathbf{K}_S + \sigma_N^2 \mathbf{K}_N$ , and  $\mathbf{e}$  is residual as  $\text{Var}(\mathbf{e}) =$   
161  $\sigma_e^2 \mathbf{I}$ . In such a mixed model, the proportion of phenotypic variation explained (PVE) by the  
162 self and neighbor effects could be calculated as  $\text{PVE}_{\text{self}} = \sigma_S^2 / (\sigma_S^2 + \sigma_N^2 + \sigma_e^2)$  and  $\text{PVE}_{\text{nei}} =$   
163  $\sigma_N^2 / (\sigma_S^2 + \sigma_N^2 + \sigma_e^2)$ , respectively. The line of extensions to incorporate neighbor effects into  
164 GWAS is referred to as “neighbor GWAS” hereafter.

165

166 **Power simulation**

167 To examine the power to detect neighbor effects, we applied the neighbor GWAS to  
168 simulated phenotypes. Phenotypes were simulated using a part of the real genotypes of *A.*  
169 *thaliana*. To evaluate the power of the simple linear model, we assumed a complex ecological  
170 form of neighbor effects with multiple variance components controlled. The power was  
171 evaluated by the receiver operating characteristic (ROC) curve on the association score of -  
172  $\log_{10}(\text{p-value})$  (e.g., Gage et al. 2018). All analyses were performed using R version 3.4.0 (R  
173 Core Team 2017).

174 **Genotype data.** To consider a realistic genetic structure in the simulation, we used  
175 part of the *A. thaliana* RegMap panel (Horton et al. 2012). The genotype data on 1307  
176 accessions were downloaded from the Joy Bergelson laboratory website  
177 ([http://bergelson.uchicago.edu/?page\\_id=790](http://bergelson.uchicago.edu/?page_id=790) accessed on 9 February 2017). We extracted the  
178 chromosome 1 and 2 data with the minor allele frequency (MAF) at  $>0.1$ , providing a matrix  
179 of 1307 plants with 65,226 single nucleotide polymorphisms (SNPs). Pairwise linkage  
180 disequilibrium (LD) among the loci was  $r^2 = 0.003$  [0.00-0.06: median with upper and lower  
181 95 percentiles]. Before generating a phenotype, each locus was centered by its mean and  
182 scaled by its standard deviation. Subsequently, we randomly selected 1296 accessions ( $= 36 \times$   
183 36 accessions) without any replacements for each iteration, and placed them in a  $36 \times 72$   
184 checkerboard space following *Arabidopsis* experimental settings (see Fig. 2b).

185 **Phenotype simulation.** To address ecological issues specific to plant neighborhood  
186 effects, we considered two extensions, namely asymmetric neighbor effects and spatial  
187 scales. Firstly, previous studies showed that such plant-plant interactions are sometimes  
188 asymmetric between two accessions in herbivory (e.g., Bergvall et al. 2006; Verschut et al.  
189 2016; Sato and Kudoh 2017) and height competition (Weiner 1990). Such asymmetric



190 neighbor effects can be tested by statistical interactions terms in a linear model (Bergvall et  
191 al. 2006; Sato and Kudoh 2017). Secondly, several studies showed that the strength of  
192 neighbor effects depended on spatial scales (Hambäck et al. 2014) and the scale of neighbors  
193 to be analyzed relied on the dispersal ability of causative organisms (see Hambäck et al.  
194 2009; Sato and Kudoh 2015; Vershute et al. 2018; Ida et al. 2018 for insect and mammal  
195 herbivores; Rieux et al. 2014 for pathogen dispersal) or the size of competing plants (Weiner  
196 1990). We assumed the distance decay at s-th sites from a focal individual i with the decay  
197 coefficient  $\alpha$  as  $w(s, \alpha) = e^{-\alpha(s-1)}$ , since such an exponential distance decay has been widely  
198 adopted in empirical studies (Devaux et al. 2007; Carrasco et al. 2010; Rieux et al. 2014; Ida  
199 et al. 2018). Therefore, we assumed a more complex model for simulated phenotypes than the  
200 model for neighbor GWAS as follows:

$$201 \quad y_i = \beta_0 + \beta_1 x_i + \frac{\beta_2}{L} \sum_{j=1}^L w(s, \alpha) x_i x_j + \beta_{12} \frac{x_i}{L} \sum_{j=1}^L w(s, \alpha) x_i x_j + u_i + e_i \quad [\text{eq. 4}],$$

202 where  $\beta_{12}$  is the coefficient for asymmetry in neighbor effects. Total variance components due  
203 to the three background effects i.e., the self, neighbor, and self-by-neighbor effects is defined  
204 as  $u_i \sim \text{Norm}(0, \sigma_S^2 \mathbf{K}_S + \sigma_N^2 \mathbf{K}_N + \sigma_{S \times N}^2 \mathbf{K}_{S \times N})$ . The three variance component parameters  $\sigma_S^2$ ,  $\sigma_N^2$ ,  
205 and  $\sigma_{S \times N}^2$ , determined the relative importance of self-genotype, neighbor, and asymmetric  
206 neighbor effects in  $u_i$ . Given the  $n$  plants  $\times$   $q$  marker explanatory matrix with  
207  $\mathbf{X}_{S \times N} = (\frac{x_i}{L} \sum_{j=1}^L w(s, \alpha) x_i x_j)$ , the similarity in asymmetric neighbor effects was calculated as  
208  $\mathbf{K}_{S \times N} = \frac{1}{q-1} \mathbf{X}_{S \times N}^T \mathbf{X}_{S \times N}$ . To control phenotypic variations, we further partitioned the proportion  
209 of phenotypic variation into those explained by major-effect genes and variance components  
210  $\text{PVE}_\beta + \text{PVE}_u$ , major-effect genes alone  $\text{PVE}_\beta$ , and residual error  $\text{PVE}_e$ , where  $\text{PVE}_\beta + \text{PVE}_u$   
211  $+ \text{PVE}_e = 1$ . The *optimize* function in R was used to adjust simulated phenotypes to given  
212 amounts of PVE.

213 **Parameter setting.** Fifteen phenotypes were simulated for each combination of the  
214 distance decay  $\alpha$ , the proportion of phenotypic variance explained by major-effect genes  
215  $PVE_{\beta}$ , variance components  $PVE_u$ , and the relative importance of multiple variance  
216 components  $\sigma_S^2:\sigma_N^2:\sigma_{S \times N}^2$  as:  $\alpha = 0.25, 1.0$  or  $3.0$ ,  $\sigma_S^2:\sigma_N^2:\sigma_{S \times N}^2 = 6:3:1, 4:4:1$ , or  $3:6:1$ ,  $PVE_{\beta} =$   
217  $0.1, 0.3$  or  $0.6$ , and  $PVE_{\beta} + PVE_u = 0.4$  or  $0.8$ . The maximum reference scale was fixed at  $s =$   
218  $3$ . The line of simulations was repeated for the number of causal SNPs at  $20$  or  $200$  to  
219 examine cases of an oligogenic and polygenic control for a trait. The non-zero coefficients for  
220 the causal SNPs were randomly sampled from a uniform distribution,  $Unif(|0.5|, |2.0|)$ , and  
221 assigned as some causal SNPs were responsible for both the self and neighbor effects. Of the  
222 total number of causal SNPs,  $15\%$  had all self, neighbor, and asymmetric neighbor effects  
223 (i.e.,  $\beta_1 \neq 0$  and  $\beta_2 \neq 0$  and  $\beta_{12} \neq 0$ ); another  $15\%$  had both the self and neighbor effects, but no  
224 asymmetry in the neighbor effects ( $\beta_1 \neq 0$  and  $\beta_2 \neq 0$  and  $\beta_{12} = 0$ ); another  $35\%$  had self-  
225 genotypic effects only ( $\beta_1 \neq 0$ ); and the remaining  $35\%$  had neighbor effects alone ( $\beta_2 \neq 0$ ).  
226 Given its biological significance, we assumed that some loci having neighbor signals  
227 possessed asymmetric interactions between neighbors ( $\beta_2 \neq 0$  and  $\beta_{12} \neq 0$ ) while the others  
228 had symmetric ones ( $\beta_2 \neq 0$  and  $\beta_{12} = 0$ ). Therefore, the number of causal SNPs in  $\beta_{12}$  was  
229 smaller than that in the main neighbor effects  $\beta_2$ . According to this assumption, the variance  
230 component  $\sigma_{S \times N}^2$  was also assumed to be smaller than  $\sigma_N^2$ .

231 **Summary statistics.** The simulated phenotypes were fitted by eq. 2 to test the  
232 significance of coefficients  $\beta_1$  and  $\beta_2$ , and to estimate the variance component due to self and  
233 neighbor effects  $PVE_{self}$  and  $PVE_{nei}$ . The stepwise likelihood ratio tests were performed first  
234 between the null model and model with a self-genotype effect alone, and then between the  
235 self-genotype effect model and model with both self and neighbor effects. The likelihood  
236 ratio was calculated as the difference in deviance i.e.,  $-2 \times \log$ -likelihood, which is

237 asymptotically  $\chi^2$  distributed with one degree of freedom. The variance components,  $PVE_{\text{self}}$   
238 and  $PVE_{\text{nei}}$ , were estimated using the average information restricted maximum likelihood  
239 (AI-REML) algorithm implemented in the *lmm.aireml* function in the *gaston* package of R  
240 (Perdry and Dandine-Roulland 2018). Subsequently, the two variance parameters  $\sigma_S^2$  and  
241  $\sigma_N^2$  were replaced with their estimates  $\hat{\sigma}_S^2$  and  $\hat{\sigma}_N^2$  by the AI-REML, and association tests  
242 were performed by solving linear mixed models with a fast approximation by an eigen value  
243 decomposition (implemented in the *lmm.diago* function: Perdry and Dandine-Roulland  
244 2018). The likelihood was computed using the *lmm.diago.profile.likelihood* function to test  $\beta_1$   
245 or  $\beta_2$ . True or false positive rates were evaluated by ROC curves and area under the ROC  
246 curves (AUC) (Gage et al. 2018). An AUC of 0.5 would indicate that GWAS has no power to  
247 detect true signals, while an AUC of 1.0 would indicate that all the top signals predicted by  
248 GWAS agree with true signals. The roc function in the pROC package (Robin et al. 2011)  
249 was used to calculate AUC from  $-\log_{10}(\text{p-value})$ . The AUC and variance components were  
250 calculated from  $s = 1$  (the first nearest neighbors) to  $s = 3$  (up to the third nearest neighbors)  
251 cases. The AUCs were also calculated using standard linear models without any random  
252 effects to examine whether the linear mixed models were superior to the linear models.

253

#### 254 ***Arabidopsis* herbivory data**

255 We applied the neighbor GWAS to field data of *Arabidopsis* herbivory. This field experiment  
256 followed our previous publication on a summer herbivory on field-grown *A. thaliana* (Sato et  
257 al. 2019). We used 200 worldwide accessions comprising the RegMap (Horton et al. 2012)  
258 and 1001 Genomes project (Alonso-Blanco et al. 2016), of which most were overlapped with  
259 a previous GWAS of biotic interactions (Horton et al. 2014) and half were included by a  
260 GWAS of glucosinolates (Chan et al. 2010). Eight replicates of the 200 accessions were first

261 prepared in a laboratory and then transferred to the outdoor garden at the Center for  
262 Ecological Research, Kyoto University, Japan (Otsu, Japan: 35° 06' N, 134° 56' E, alt. ca. 200  
263 m: Fig. 2a). Seeds were sown on Jiffy-seven pots (33-mm diameter), and stratified under 4 °C  
264 for a week. Seedlings were cultivated for 1.5 months under a short-day condition (8 h light:  
265 16 h dark, 20 °C). Plants were then separately potted in plastic pots (6 cm in diameter) filled  
266 with mixed soil of agricultural composts (Metro-mix 350, SunGro Co., USA) and perlites at a  
267 3:1 L ratio. In the field setting, 200 accessions were randomly assigned in a checkered  
268 manner within a block (Fig. 2b). Eight replicates of these blocks were set >2 m apart from  
269 each other (Fig. 2c). Potted plants were exposed to the field environment for 3 wk in June  
270 2017. At the end of experiment, we scored leaves eaten as 0 for no visible damage, 1 for  
271 ≤10%, 2 for >10% and ≤ 25%, 3 for > 25% and ≤ 50%, 4 for >50% and ≤ 75%, and 5 for  
272 >75% of the leaf area eaten. All plants were scored by a single person to avoid observer bias.  
273 The most predominant herbivore in this field trial was the diamond back moth *Plutella*  
274 *xylostella*, followed by the small white butterfly *Pieris rapae*. We also recorded the initial  
275 plant size and the presence of inflorescence to incorporate them as covariates. Initial plant  
276 size was evaluated by the length of the largest rosette leaf (mm) at the beginning of the field  
277 experiment and the presence of inflorescence was recorded 2 wk after transplanting.

278 We estimated the variance components and performed the association tests for the  
279 leaf damage score with the neighbor covariate at  $s = 1$  and 2. These two scales corresponded  
280 to  $L = 4$  (the nearest four neighbors) and  $L = 12$  (up to the second nearest neighbors),  
281 respectively, in the *Arabidopsis* dataset. The variation partitioning and association tests were  
282 performed using the *gaston* package, as mentioned above. To determine the significance of  
283 variance component parameters, we compared the likelihood between mixed models with one  
284 or two random effects. For the genotype data, we used an imputed SNP matrix of all the 2029

285 accessions studied by the RegMap (Horton et al. 2012) and 1001 Genomes project (Alonso-  
286 Blanco et al. 2016). Missing genotypes were imputed using BEAGLE (Browning and  
287 Browning 2009), as described by Togninalli et al. (2018) and updated on the AraGWAS  
288 Catalog (<https://aragwas.1001genomes.org>). Of the 10,709,466 SNPs from the full imputed  
289 matrix, we used 1,242,128 SNPs with MAF at  $> 0.05$  and LD of adjacent SNPs at  $r^2 < 0.8$ . We  
290 considered the initial plant size, presence of inflorescence, and experimental blocks as fixed  
291 covariates. After the association mapping, we searched candidate genes within  $\sim 10$  kb around  
292 target SNPs, based on the Araport11 gene model with the latest TAIR annotation (accessed on  
293 7 September 2019). Gene ontology (GO) enrichment analysis was applied to the candidate  
294 genes near the top 0.1% SNP score. GO categories including  $>20$  and  $<200$  genes were tested  
295 by Fisher's exact probability tests and adjusted by false discovery rate (FDR: Benjamini and  
296 Hochberg 1995). The GO.db package (Carlson et al. 2018) and the latest TAIR AGI code  
297 annotation were used for the GO enrichment analysis. The R source codes, accession list, and  
298 phenotype data are available at the GitHub repository  
299 (<https://github.com/naganolab/NeighborGWAS>).

300

## 301 **RESULTS**

302

### 303 **Power simulation**

304 A set of phenotypes were simulated from real genotype data following a complex model eq.  
305 4, and then fitted by a simplified model eq. 2. Analyzing the factors affecting AUCs, we  
306 found that the proportion of phenotypic variation (PVE) explained by major-effect genes  
307  $PVE_{\beta}$  and distance decay of neighbor effects were the most influential on the power to detect  
308 neighbor signals (Table 1b, d). In addition to  $PVE_{\beta}$ , the amount of variance components

309 PVE<sub>u</sub> also significantly affected the AUCs of the self and neighbor effects, but these  
310 additional effects were less significant compared to those of PVE<sub>β</sub> alone (Table 1). In  
311 contrast, the AUCs of neither self nor neighbor effects were significantly affected by the ratio  
312 of three variance components  $\sigma_S^2:\sigma_N^2:\sigma_{SXN}^2$  (Table 1).

313 Notably, there was a clear relationship between the distance decay  $\alpha$  and the  
314 proportion of phenotypic variation explained by neighbor effects PVE<sub>nei</sub> or AUCs at different  
315 spatial scales (Fig. 3). If the distance decay was weak and the effective range of neighbor  
316 effects was broad, PVE<sub>nei</sub> and AUCs increased linearly as the reference spatial scale was  
317 broadened (Fig. 3a). On the other hand, if the distance decay was strong and the effective  
318 scale of neighbor effects was narrow, PVE<sub>nei</sub> saturated at the scale of the first nearest  
319 neighbors (Fig. 3c) or AUCs did not increase (Fig. 3b, c). These results remained the same  
320 between the number of causal SNPs = 20 and 200 (Fig. 3 and Fig. S1). The line of simulation  
321 results indicated that the effective spatial scales could be estimated by calculating PVE<sub>nei</sub>  
322 across different spatial scales.

323 In the case of the number of causal SNPs = 20, signals of major-effect genes were  
324 well detected as AUC ranged from moderate (>0.7) to high (>0.9) (Fig. S2). For the case of  
325 the number of causal SNPs = 200, it became relatively difficult to detect the major-effect  
326 genes as AUCs were  $\leq 0.75$  (Fig. S2). The line of simulations indicated that neighbor effects  
327 were detectable when a target trait was governed by several major genes and the range of  
328 neighbor effects was spatially limited. Additionally, linear mixed models outperformed  
329 standard linear models in the detection of self and neighbor signals ( $\Delta AUC_{self} = 0.105 [0.101$   
330  $- 0.109]$ ,  $\Delta AUC_{nei} = 0.024 [0.021 - 0.026]$ : 10,000-times bootstrap mean with 95%  
331 confidence intervals). This indicated that the mixed models were more appropriate for the  
332 neighbor GWAS to deal with spurious associations due to a sample structure.

333

### 334 *Arabidopsis* herbivory data

335 The variation partitioning of leaf damage showed that the PVE by neighbor effects were  
336 larger than PVE by self-genotypic effects ( $PVE_{\text{self}} = 0.026$ ,  $\chi_1^2 = 0.151$ , p-value = 0.70;  
337  $PVE_{\text{nei}} = 0.218$ ,  $\chi_1^2 = 7.17$ , p-value = 0.0074; Fig. 4a). Heritability, namely  $PVE_{\text{self}}$  without  
338 neighbor effects, was 0.159 ( $\chi_1^2 = 8.73$ , p-value = 0.003; Fig. S3). This range of heritability  
339 was overlapped with PVE by neighbor effects alone ( $PVE_{\text{nei}}$  without self-effects = 0.24 at  
340 scale  $s = 1$ ,  $\chi_1^2 = 15.7$ , p-value < 0.0001; Fig. S3), indicating that there was an intersection  
341 between PVE by self and neighbor effects on the leaf damage variation. Phenotypic variation  
342 explained by neighbor effects on leaf damage did not increase when the neighbor scale was  
343 referred up to the nearest and second nearest individuals ( $PVE_{\text{self}} = 0.083$ ,  $\chi_1^2 = 1.03$ , p-value  
344 = 0.311;  $PVE_{\text{nei}} = 0.13$ ,  $\chi_1^2 = 1.29$ , p-value = 0.256; Fig. 4a); therefore, the variation  
345 partitioning was stopped at  $s = 2$ . These results indicated a narrow effective scale and  
346 significant contribution of neighbor effects to the leaf damage score.

347 Association mapping of the self-genotype effects on the leaf damage found a SNP  
348 with the largest  $-\log_{10}(\text{p-values})$  score at “chr1-23149476”. This SNP was located within ~10  
349 kb of the AT1G62540 locus that encoded flavin-monooxygenase glucosinolate S-oxygenase 2  
350 (FMO GS-OX2), though this was not above a threshold of Bonferroni correction. Gene  
351 ontology annotation of “cellular response to extracellular stimulus” was marginally enriched  
352 among genes within ~10 kb around SNPs with the top 0.1%  $-\log_{10}(\text{p-values})$  score which  
353 corresponded to p-values at < 0.00096 (FDR<0.1; Table 2a). A QQ-plot did not exhibit an  
354 inflation of p-values for the self-genotype effects (Fig. S4).

355 We found a marginally significant SNP for neighbor effects at the second and third  
356 chromosome (Fig. 4c), of which the second chromosomal region had higher association

357 scores than expected by the QQ-plot (Fig. S4). A locus encoding FAD-binding Berberine  
358 family protein (AT2G34810 named *BBE16*) were located within the ~10 kb window near the  
359 SNP with the largest  $-\log_{10}(\text{p-values})$  at the second chromosome, which are known to be up-  
360 regulated by methyl jasmonate (Devoto et al. 2005). Three transposable elements and a  
361 pseudogene of lysyl-tRNA synthetase 1 were located near the most significant SNP at the  
362 third chromosome. These top ten SNPs significantly related to the neighbor effects exhibited  
363 positive estimates of  $\beta_1$  and  $\beta_2$ . Three defense-related GO annotations of “killing cells of  
364 other organisms” and “disruption of cells of other organism” were significantly enriched  
365 among genes within ~10 kb around SNPs with the top 0.1% score of  $-\log_{10}(\text{p-values})$   
366 (FDR<0.05: Table 2b). Of the genes with these GO annotations, we found 22 low-molecular  
367 weight cysteine-rich proteins or plant defensin family proteins (Table S2).

368         Based on the estimated coefficients  $\hat{\beta}_1$  and  $\hat{\beta}_2$ , we ran a post hoc simulation to infer  
369 a spatial arrangement that minimizes a population sum of the leaf damage  $\sum y_i = \beta_1 \sum x_i +$   
370  $\beta_2 \sum_{\langle i,j \rangle} x_i x_j$ . The constant intercept  $\beta_0$ , the variance component  $u_i$ , and residual  $e_i$  were not  
371 considered because they were not involved in deterministic dynamics of the model. Figure 5  
372 shows three representatives and a neutral expectation. For example, a mixture of a  
373 dimorphism was expected to decrease the total leaf damage for a SNP at “chr2-14679190”  
374 near the *BBE16* locus ( $\hat{\beta}_2 > 0$ : Fig. 5a). On the other hand, a clustered distribution of a  
375 dimorphism was expected to decrease the total damage for a SNP at “chr2-9422409” near the  
376 AT2G22170 locus encoding a lipase/lipoxygenase PLAT/LH2 family protein ( $\hat{\beta}_1 \approx 0$ ,  $\hat{\beta}_2 < 0$ :  
377 Fig. 5b). Furthermore, near monomorphism was expected to decrease the leaf damage for a  
378 SNP at “chr5-19121831” near the AT5G47075 and AT5G47077 loci encoding low-molecular  
379 cysteine-rich proteins, LCR20 and LCR6 ( $\hat{\beta}_1 > 0$ ,  $\hat{\beta}_2 < 0$ : Fig. 5c). No self and neighbor effects



380 led to a random distribution and no mitigation of damage i.e.,  $\sum y_i \approx 0$  (Fig. 5d). These post  
381 hoc simulations suggested a potential applicability of neighbor GWAS in optimizing spatial  
382 arrangements in field cultivation.

383

## 384 **DISCUSSION**

385

### 386 **Spatial and genetic factors affecting the power to detect signals**

387 Benchmark tests using simulated phenotypes revealed that appropriate spatial scales could be  
388 estimated by variation partitioning of observed phenotypes. When the scale of neighbor  
389 effects was narrow or moderate ( $\alpha = 1.0$  or  $3.0$ ), the scale of the first nearest neighbors would  
390 be optimum for the power to detect neighbor signals. In terms of neighbor effects in plant  
391 defense, mobile animals, such as mammalian browsers and flying insects, often select a  
392 cluster of plant individuals (e.g., Bergvall et al. 2006; Hambäck et al. 2009; Vershuta et al.  
393 2016); however, neighbor effects could not be detected among individual plants within a  
394 cluster (Hambäck et al. 2014; Sato and Kudoh 2015). This case was represented by the  
395 exponential distance decay of  $\alpha = 0.25$ ; only in such a special case should more than the first  
396 nearest be referred to gain the power.

397 Neighbor GWAS could retain its power as long as neighbor effects were spatially  
398 limited and several major-effect genes governed a trait. In contrast, when hundreds of causal  
399 variants involved a single trait and less than half of phenotypic variation was attributable to  
400 neighbor effects, we observed a reasonable power down of neighbor GWAS. In GWAS, false  
401 positive rates can be reduced using linear mixed models that deal with kinship structure as a  
402 random effect (Korte and Farlow 2013). Indeed, mixed models were superior to standard  
403 linear models in this simulation. Our simulation also adjusted the three variance components

404  $\sigma_S^2$ ,  $\sigma_N^2$ , and  $\sigma_{S \times N}^2$ , but their relative contribution did not have significant effects on the power.  
405 This was likely due to the fact that the self-genotypic variable  $x_i$  was encompassed into the  
406 neighbor variable  $\sum x_i x_j / L$ , and thus the kinship matrix  $\mathbf{K}_S$  was partially redundant with the  
407 similarity matrix of neighbor effects  $\mathbf{K}_N$ . Indeed, elemental-wise correlations between  $\mathbf{K}_S$   
408 and  $\mathbf{K}_N$  were strong in our simulations ( $R^2 > 0.7$ ). Thus, linear mixed models gain the power  
409 to detect neighbor effects if signals are strong, but likelihood ratio tests are reliable enough to  
410 deal with the correlated variables.

411

#### 412 **Candidate genes related to field herbivory on *Arabidopsis***

413 Our *Arabidopsis* data successfully detected known defense-related genes involved in the self-  
414 genotype effects on leaf damage. Aliphatic glucosinolates are a major chemical defense  
415 against insect herbivory (Brachi et al. 2015; Kerwin et al. 2017). Specifically, FMO GS-OX2  
416 is involved in aliphatic glucosinolate biosynthesis by catalyzing the conversion from  
417 methylthioalkyl to corresponding methylsulfinylalkyl glucosinolates (Li et al. 2008).  
418 Furthermore, previous GWAS reported methionine synthase 2 (AT3G03780), disease  
419 resistance protein (TIR-NBS-LRR class) family (AT4G16950), and monodehydroascorbate  
420 reductase 4 (AT3G27820) as candidate genes involved in self-resistance to the white butterfly  
421 *Pieris rapae* (Davila-Olivas et al. 2017; Nallu et al. 2018). In this field experiment, we  
422 observed larvae of *P. rapae* largely feeding on *A. thaliana*, and the GWAS of self-genotype  
423 effects on leaf damage detected the above three candidate genes near SNPs with the top 0.1%  
424 association score. Thus, our GWAS results seemed convincing in terms of the detection of  
425 known defense-related genes in the self-genotypic effects on herbivory.

426 Notably, the neighbor effects in herbivory were relevant to candidate genes  
427 disrupting cells of other organisms. Plant defensins are stable and cysteine-rich peptides that

428 confer plant resistance by killing cells of other organisms (Stotz 2009). While anti-fungal  
429 resistance is a well-known function of plant defensins (Stotz 2009), they can also act as  
430 protease inhibitors against insect herbivores (Bloch and Richardson 1991; Pelegri et al.  
431 2008; Choi et al. 2009). Typical examples of neighbor effects may be a direct induction of  
432 plant defense via volatile organic chemicals (e.g., Schuman et al. 2015; Dahlin et al. 2018),  
433 but ecological studies have shown that herbivore host choice is one of the most important  
434 processes leading indirect neighbor effects to anti-herbivore defenses (Bergvall et al. 2006;  
435 Verschut et al. 2016; Sato et al. 2017). The findings of our neighbor GWAS suggest a putative  
436 role of plant defensins in modulating insect feeding behaviors and thus neighbor effects in  
437 herbivory.

438

### 439 **Conclusion and applicability**

440 Based on the newly proposed methodology, we suggest that neighbor effects are a more  
441 important source of phenotypic variation in field-grown plants than currently appreciated. To  
442 date, regional-scale interactions among plants have been analyzed using a genome-  
443 environment association study of plant community composition (Frachon et al. 2019), but  
444 fine-scale neighbor effects have yet to be examined. Using tens of *A. thaliana* accessions and  
445 their experimentally mixed populations, Wuest and Niklaus (2018) recently showed that a  
446 single genomic region drives neighbor effects in plant growth via soil improvements, and this  
447 genetic effect shapes a positive relationship between plant genotype diversity and  
448 productivity. Our newly proposed methodology of neighbor GWAS could be a powerful tool  
449 to identify such a key genetic variant responsible for neighbor effects and resulting  
450 biodiversity effects.

451 Neighbor GWAS may also potentially help determine an optimal spatial arrangement

452 in plant cultivation, as suggested by the post hoc simulation. The Ising model is well  
453 established in statistical physics (McCoy and Maillard 2012) and is now applied to a  
454 machine-learning pipeline that deals with high-dimensionality in genomics data (Fisher and  
455 Mehta 2015). Genome-wide polymorphism data are useful not only to seek causal genes in  
456 GWAS, but also to predict breeding values of crop plants in genomic selection (e.g., Jannink  
457 et al. 2010; Hamblin et al. 2011; Yamamoto et al. 2017). Although it is still challenging to  
458 determine  $\beta_1$  and  $\beta_2$  for all SNPs efficiently, the linear model of neighbor GWAS could also  
459 be implemented as a genomic selection at a population level. Thus, our study provides an  
460 avenue for future studies to predict population-level phenotypes in spatially structured  
461 environments.  
462

463 **ACKNOWLEDGEMENTS**

464 The authors thank Ü. Seren, A. Korte, and M. Nordborg for kindly providing the full imputed  
465 SNP data; and T. Tsuchimatsu and K. Iwayama for discussions. This study was supported by  
466 the Japan Science and Technology Agency (JST) PRESTO (Grant number, JPMJPR17Q4 and  
467 JPMJPR16Q9) to Y.S. and E.Y.; Japan Society for the Promotion of Science (JSPS)  
468 Postdoctoral Fellowship (16J30005) to Y.S.; MEXT KAKENHI (18H04785) and the Swiss  
469 National Science Foundation to K.K.S.; and JST CREST (JPMJCR15O2 and JPMJCR16O3)  
470 to A.J.N. and K.K.S. The field experiment was supported by the Joint Usage/Research Grant  
471 of Center for Ecological Research, Kyoto University, Japan.

472

473 **CONFLICT OF INTEREST**

474 The authors declare that there are no conflicts of interests in this study.

475

476 **DATA ARCHIVING**

477 The leaf damage data on *A. thaliana* are included in the supporting information (Table S1).

478 The R source codes used in this study are available at the GitHub repository

479 (<https://github.com/naganolab/NeighborGWAS>).

480

481 **REFERENCES**

- 482 1. Alonso-Blanco C, Andrade J, Becker C, Bemm F, Bergelson J, Borgwardt KM. et al.  
483 (2016). 1,135 genomes reveal the global pattern of polymorphism in *Arabidopsis*  
484 *thaliana*. Cell 166: 481–491. doi:10.1016/j.cell.2016.05.063
- 485 2. Atwell S, Huang YS, Vilhjálmsson BJ, Willems G, Horton M, Li Y. et al. (2010).  
486 Genome-wide association study of 107 phenotypes in *Arabidopsis thaliana* inbred lines.

- 487 Nature 465: 627–631.
- 488 3. Azaele S, Muneeppeerakul R, Rinaldo A, Rodriguez-Iturbe I. (2010). Inferring plant  
489 ecosystem organization from species occurrences. *J Theor Biol* **262**: 323–329.  
490 doi:10.1016/j.jtbi.2009.09.026
- 491 4. Barbosa P, Hines J, Kaplan I, Martinson H, Szczepaniec A, Szendrei Z. (2009).  
492 Associational resistance and associational susceptibility: Having right or wrong  
493 neighbors. *Ann Rev Ecol Evol Sys* 40: 1–20.
- 494 5. Benjamini Y, Hochberg Y. (1995). Controlling the false discovery rate: a practical and  
495 powerful approach to multiple testing. *J Royal Stat Soc B* 57: 289–300.  
496 doi:10.1111/j.2517-6161.1995.tb02031.x
- 497 6. Bergvall UA, Rautio P, Kesti K, Tuomi J, Leimar O. (2006). Associational effects of  
498 plant defences in relation to within- and between-patch food choice by a mammalian  
499 herbivore: neighbour contrast susceptibility and defence. *Oecologia* 147: 253–260.  
500 doi:10.1007/s00442-005-0260-8
- 501 7. Bloch C, Richardson M. (1991). A new family of small (5 kDa) protein inhibitors of  
502 insect  $\alpha$ -amylases from seeds of sorghum (*Sorghum bicolor* (L) Moench) have sequence  
503 homologies with wheat  $\gamma$ -purothionins. *FEBS letters* 279: 101-104.
- 504 8. Brachi B, Meyer CG, Villoutreix R, Platt A, Morton TC, Roux F, Bergelson J. (2015).  
505 Coselected genes determine adaptive variation in herbivore resistance throughout the  
506 native range of *Arabidopsis thaliana*. *Proc Natl Acad Sci USA* 112: 4032–4037.
- 507 9. Browning BL, Browning SR. (2009). A unified approach to genotype imputation and  
508 haplotype-phase inference for large data sets of trios and unrelated individuals. *Am J*  
509 *Hum Genet* 84: 210-223.
- 510 10. Carlson M. (2018). GO.db: A set of annotation maps describing the entire Gene

- 511        Ontology. R package version 3.7.0.
- 512    11. Carrasco LR, Harwood TD, Toepfer S, MacLeod A, Levay N, Kiss J, Baker RHA,  
513        Mumford JD, Knight JD. (2010). Dispersal kernels of the invasive alien western corn  
514        rootworm and the effectiveness of buffer zones in eradication programmes in Europe.  
515        *Ann Appl Biol* 156: 63–77. doi:10.1111/j.1744-7348.2009.00363.x
- 516    12. Chan EKF, Rowe HC, Kliebenstein DJ. (2010). Understanding the evolution of defense  
517        metabolites in *Arabidopsis thaliana* using genome-wide association mapping. *Genetics*  
518        185: 991–1007.
- 519    13. Choi MS, Kim YH, Park HM, Seo BY, Jung JK, Kim ST. et al. (2009). Expression of  
520        BrD1, a plant defensin from *Brassica rapa*, confers resistance against brown planthopper  
521        (*Nilaparvata lugens*) in transgenic rices. *Mol Cells* 28: 131–137. doi:10.1007/s10059-  
522        009-0117-9.
- 523    14. Dahlin I, Rubene D, Glinwood R, Ninkovic V. (2018). Pest suppression in cultivar  
524        mixtures is influenced by neighbor-specific plant-plant communication. *Ecol Appl* 28:  
525        2187–2196. doi:10.1002/eap.1807
- 526    15. Devaux C, Lavigne C, Austerlitz F, Klein EK. (2007). Modelling and estimating pollen  
527        movement in oilseed rape (*Brassica napus*) at the landscape scale using genetic markers.  
528        *Mol Ecol* 16: 487–499. doi:10.1111/j.1365-294X.2006.03155.x
- 529    16. Davila-Olivas NH, Kruijer W, Gort G, Wijnen CL, van Loon JJA, Dicke M. (2017).  
530        Genome-wide association analysis reveals distinct genetic architectures for single and  
531        combined stress responses in *Arabidopsis thaliana*. *New Phytol* 213: 838–851.  
532        doi:10.1111/nph.14165
- 533    17. Devoto A, Ellis C, Magusin A, Chang HS, Chilcott C, Zhu T, Turner JG. (2005).  
534        Expression profiling reveals *COII* to be a key regulator of genes involved in wound- and

- 535 methyl jasmonate-induced secondary metabolism, defence, and hormone interactions.  
536 Plant Mol Biol 58: 497–513.
- 537 18. Dicke M, Baldwin IT. (2010). The evolutionary context for herbivore-induced plant  
538 volatiles: beyond the ‘cry for help’. Trends Plant Sci 15: 167–175.  
539 doi:10.1016/j.tplants.2009.12.002
- 540 19. Erb M. (2018). Volatiles as inducers and suppressors of plant defense and immunity -  
541 origins, specificity, perception and signaling. Curr Opin Plant Biol 44: 117–121.  
542 doi:10.1016/j.pbi.2018.03.008
- 543 20. Frachon L, Mayjonade B, Bartoli C, Hautekèete NC, Roux F. (2019). Adaptation to plant  
544 communities across the genome of *Arabidopsis thaliana*. Mol Biol Evol 36: 1442–1456.
- 545 21. Fisher CK, Mehta P. (2015). Bayesian feature selection for high-dimensional linear  
546 regression via the Ising approximation with applications to genomics. Bioinformatics 31:  
547 1754–1761.
- 548 22. Gage JL, De Leon N, Clayton MK. (2018). Comparing genome-wide association study  
549 results from different measurements of an underlying phenotype. G3: Genes, Genomes,  
550 Genetics 8: 3715–3722.
- 551 23. Genung MA, Bailey JK, Schweitzer JA. (2012). Welcome to the neighbourhood:  
552 interspecific genotype by genotype interactions in *Solidago* influence above- and  
553 belowground biomass and associated communities. Ecol Lett 15: 65–73.
- 554 24. Gondro C, van der Werf J, Hayes B. (eds.) (2013). Genome-wide association studies and  
555 genomic prediction. Methods Mol Biol. Humana Press, New York.
- 556 25. Hambäck PA, Björkman M, Rämert B, Hopkins RJ. (2009). Scale-dependent responses  
557 in cabbage herbivores affect attack rates in spatially heterogeneous systems. Basic Appl  
558 Ecol 10: 228–236. doi:10.1016/j.baae.2008.06.004



- 559 26. Hambäck PA, Inouye BD, Andersson P, Underwood N. (2014). Effects of plant  
560 neighborhoods on plant-herbivore interactions: resource dilution and associational  
561 effects. *Ecology* 95: 1370–1383. doi:10.1890/13-0793.1
- 562 27. Hamblin MT, Buckler ES, Jannink JL. (2011). Population genetics of genomics-based  
563 crop improvement methods. *Trends Genet* 27: 98–106.
- 564 28. Hauser MT, Harr B, Schlötterer C. (2001). Trichome distribution in *Arabidopsis thaliana*  
565 and its close relative *Arabidopsis lyrata*: molecular analysis of the candidate gene  
566 *GLABROUS1*. *Mol Biol Evol* 18: 1754–1763.
- 567 29. Horton MW, Hancock AM, Huang YS, Toomajian C, Atwell S, Auton A, et al. (2012).  
568 Genome-wide patterns of genetic variation in worldwide *Arabidopsis thaliana* accessions  
569 from the RegMap panel. *Nat Genet* 44: 212–216. doi:10.1038/ng.1042
- 570 30. Horton MW, Bodenhausen N, Beilsmith K, Meng D, Muegge BD, Subramanian S, et al.  
571 (2014). Genome-wide association study of *Arabidopsis thaliana* leaf microbial  
572 community. *Nat Commun* 5: 5320. doi:10.1038/ncomms6320
- 573 31. Ida TY, Takanashi K, Tamura M, Ozawa R, Nakashima Y, Ohgushi T. (2018). Defensive  
574 chemicals of neighboring plants limit visits of herbivorous insects: Associational  
575 resistance within a plant population. *Ecol Evol* 8: 12981–12990. doi:10.1002/ece3.4750
- 576 32. Ising E. (1925). Beitrag zur theorie des ferromagnetismus. *Zeitschrift für Physik* 31: 253–  
577 258.
- 578 33. Jannink JL, Lorenz AJ, Iwata H. (2010). Genomic selection in plant breeding: from  
579 theory to practice. *Brief Funct Genomic* 9: 166–177.
- 580 34. Kang HM, Zaitlen NA, Wade CM, Kirby A, Heckerman D, Daly MJ, Eskin E. (2008).  
581 Efficient control of population structure in model organism association mapping.  
582 *Genetics* 178: 1709–1723.

- 583 35. Kerwin RE, Feusier J, Muok A, Lin C, Larson B, Copeland D. et al. (2017). Epistasis ×  
584 environment interactions among *Arabidopsis thaliana* glucosinolate genes impact  
585 complex traits and fitness in the field. *New Phytol* 215: 1249–1263.
- 586 36. Kizaki S, Katori M. (1999). Analysis of canopy-gap structures of forests by Ising-Gibbs  
587 states-equilibrium and scaling property of real forests. *J Phys Soc Japan* 68: 2553-2560.
- 588 37. Korte A, Farlow A. (2013). The advantages and limitations of trait analysis with GWAS:  
589 a review. *Plant Methods* 9: 29.
- 590 38. Li J, Hansen BG, Ober JA, Kliebenstein DJ, Halkier BA. (2008). Subclade of flavin-  
591 monooxygenases involved in aliphatic glucosinolate biosynthesis. *Plant Physiol* 148:  
592 1721–1733.
- 593 39. McCoy BM, Maillard JM. (2012). The importance of the Ising model. *Progress Theor*  
594 *Phys* 127: 791-817.
- 595 40. Mundt CC. (2002). Use of multiline cultivars and cultivar mixtures for disease  
596 management. *Ann Rev Phytopathol* 40: 381-410.
- 597 41. Nallu S, Hill JA, Don K, Sahagun C, Zhang W, Meslin C. et al. (2018). The molecular  
598 genetic basis of herbivory between butterflies and their host plants. *Nat Ecol Evol* 2:  
599 1418-1427. doi:10.1038/s41559-018-0629-9
- 600 42. Pelegri PB, Lay FT, Murad AM, Anderson MA, Franco OL. (2008). Novel insights on  
601 the mechanism of action of A-amylase inhibitors from the plant defensin family.  
602 *Proteins: Struct Funct Bioinformatics* 73: 719–729. doi:10.1002/prot.22086.
- 603 43. Perdry H, Dandine-Roulland C. (2018). *gaston*: Genetic Data Handling (QC, GRM, LD,  
604 PCA) & Linear Mixed Models. R package version 1.5.4. [https://CRAN.R-](https://CRAN.R-project.org/package=gaston)  
605 [project.org/package=gaston](https://CRAN.R-project.org/package=gaston)
- 606 44. R Core Team. (2017). R: A language and environment for statistical computing. R

- 607 Foundation for Statistical Computing, Vienna, Austria. <https://www.R-project.org/>
- 608 45. Rieux A, Soubeyrand S, Bonnot F, Klein EK, Ngando JE, Mehl A. et al. (2014). Long-  
609 distance wind-dispersal of spores in a fungal plant pathogen: estimation of anisotropic  
610 dispersal kernels from an extensive field experiment. PLoS ONE 9: e103225.  
611 doi:10.1371/journal.pone.0103225
- 612 46. Robin X, Turck N, Hainard A, Tiberti N, Lisacek F, Sanchez JC, Muller M. (2011).  
613 pROC: an open-source package for R and S+ to analyze and compare ROC curves. *BMC*  
614 *Bioinformatics* **12**: 77. doi:10.1186/1471-2105-12-77
- 615 47. Schlicht R, Iwasa Y. (2004). Forest gap dynamics and the Ising model. *J Theoret Biol*  
616 **230**: 65–75. doi:10.1016/j.jtbi.2004.04.027
- 617 48. Sato Y. (2018). Associational effects and the maintenance of polymorphism in plant  
618 defense against herbivores: review and evidence. *Plant Species Biol* **33**: 91–108.  
619 doi:10.1111/1442-1984.12201
- 620 49. Sato Y, Kudoh H. (2015). Tests of associational defence provided by hairy plants for  
621 glabrous plants of *Arabidopsis halleri* subsp. *gemmifera* against insect herbivores. *Ecol*  
622 *Entomol* **40**: 269–279. doi:10.1111/een.12179
- 623 50. Sato Y, Kudoh H. (2017). Herbivore-mediated interaction promotes the maintenance of  
624 trichome dimorphism through negative frequency-dependent selection. *Am Nat* **190**:  
625 E67–E77. doi:10.1086/692603
- 626 51. Sato Y, Ito K, Kudoh H. (2017). Optimal foraging by herbivores maintains  
627 polymorphism in defence in a natural plant population. *Funct Ecol* **31**: 2233–2243.  
628 doi:10.1111/1365-2435.12937
- 629 52. Sato Y, Shimizu-Inatsugi R, Yamazaki M, Shimizu KK, Nagano AJ. (2019). Plant  
630 trichomes and a single gene *GLABRA1* contribute to insect community composition on

- 631 field-grown *Arabidopsis thaliana*. BMC Plant Biol 19:163. doi:10.1186/s12870-019-  
632 1705-2
- 633 53. Schuman MC, Allmann S, Baldwin IT. (2015). Plant defense phenotypes determine the  
634 consequences of volatile emission for individuals and neighbors. eLife 4: e04490
- 635 54. Stotz HU, Thomson J, Wang Y. (2009). Plant defensins: defense, development and  
636 application. Plant Signal Behav 4: 1010–1012.
- 637 55. Tahvanainen JO, Root RB. (1972). The influence of vegetational diversity on the  
638 population ecology of a specialized herbivore, *Phyllotreta cruciferae* (Coleoptera:  
639 Chrysomelidae). Oecologia 10: 321–346.
- 640 56. Togninalli M, Seren Ü, Meng D, Fitz J, Nordborg M, Weigel D. et al. (2018). The  
641 AraGWAS Catalog: a curated and standardized *Arabidopsis thaliana* GWAS catalog.  
642 Nucleic Acids Res 46: D1150–D1156.
- 643 57. Underwood N, Inouye BD, Hambäck PA. (2014). A conceptual framework for  
644 associational effects: when do neighbors matter and how would we know? Q Rev Biol  
645 89: 1–19.
- 646 58. Verschut TA, Becher PG, Anderson P, Hambäck PA. (2016). Disentangling associational  
647 effects: both resource density and resource frequency affect search behaviour in complex  
648 environments. Funct Ecol 30: 1826-1833.
- 649 59. Wang M, Roux F, Bartoli C, Huard-Chauveau C, Meyer C, Lee H. et al. (2018). Two-  
650 way mixed-effects methods for joint association analysis using both host and pathogen  
651 genomes. Proc Natl Acad Sci USA 115: E5440–E5449. doi:10.1073/pnas.1710980115
- 652 60. Weiner J. (1990). Asymmetric competition in plant populations. Trends Ecol Evol 5: 360-  
653 364.
- 654 61. Wuest SE, Niklaus PA. (2018). A plant biodiversity effect resolved to a single

- 655 chromosomal region. *Nat Ecol Evol* 2: 1933–1939.
- 656 62. Yamamoto E, Matsunaga H, Onogi A, Ohyama A, Miyatake K, Yamaguchi H. et al.  
657 (2017). Efficiency of genomic selection for breeding population design and phenotype  
658 prediction in tomato. *Heredity* 118: 202–209.
- 659 63. Zeller SL, Kalinina O, Flynn DFB, Schmid B. (2012). Mixtures of genetically modified  
660 wheat lines outperform monocultures. *Ecol Appl* 22: 1817–1826.
- 661
- 662

663 **TABLES & FIGURES**

664 **Table 1.** Factors affecting the power to detect signals in simulated phenotypes. The response  
 665 variable was the maximum Area Under the ROC Curve (AUC) of the spatial scales from  $s =$   
 666 1 to  $s = 3$ . ANOVA tables show the degree of freedom (df), sum of squares (SS), F-statistics,  
 667 and p-values.

(a) AUC<sub>self</sub>, No. of causal SNPs = 20

| Factors                                | df  | SS     | F     | p-value   |
|----------------------------------------|-----|--------|-------|-----------|
| $\sigma_S^2:\sigma_N^2:\sigma_{SxN}^2$ | 2   | 0.0110 | 1.91  | 0.149     |
| $\alpha$                               | 1   | 0.0003 | 0.10  | 0.750     |
| PVE $_{\beta}$                         | 1   | 0.410  | 142.7 | < 2.2e-16 |
| PVE $_{\beta}$ + PVE $_{\alpha}$       | 1   | 0.0196 | 6.81  | 0.00933   |
| <i>residuals</i>                       | 534 | 1.53   |       |           |

(c) AUC<sub>self</sub>, No. of causal SNPs = 200

| Factors                                | df  | SS     | F    | p-value  |
|----------------------------------------|-----|--------|------|----------|
| $\sigma_S^2:\sigma_N^2:\sigma_{SxN}^2$ | 2   | 0.0000 | 0.01 | 0.9909   |
| $\alpha$                               | 1   | 0.0044 | 6.05 | 0.0142   |
| PVE $_{\beta}$                         | 1   | 0.798  | 1106 | <2.2e-16 |
| PVE $_{\beta}$ + PVE $_{\alpha}$       | 1   | 0.0115 | 16.0 | 7.29E-05 |
| <i>residuals</i>                       | 534 | 0.385  |      |          |

(b) AUC<sub>nei</sub>, No. of causal SNPs = 20

| Factors                                | df  | SS    | F    | p-value   |
|----------------------------------------|-----|-------|------|-----------|
| $\sigma_S^2:\sigma_N^2:\sigma_{SxN}^2$ | 2   | 0.013 | 1.4  | 0.259     |
| $\alpha$                               | 1   | 1.006 | 205  | < 2.2e-16 |
| PVE $_{\beta}$                         | 1   | 1.101 | 225  | < 2.2e-16 |
| PVE $_{\beta}$ + PVE $_{\alpha}$       | 1   | 0.060 | 12.2 | 0.000520  |
| <i>residuals</i>                       | 174 | 2.62  |      |           |

(d) AUC<sub>nei</sub>, No. of causal SNPs = 200

| Factors                                | df  | SS     | F    | p-value   |
|----------------------------------------|-----|--------|------|-----------|
| $\sigma_S^2:\sigma_N^2:\sigma_{SxN}^2$ | 2   | 0.0011 | 0.81 | 0.445     |
| $\alpha$                               | 1   | 0.195  | 295  | < 2.2e-16 |
| PVE $_{\beta}$                         | 1   | 0.248  | 375  | < 2.2e-16 |
| PVE $_{\beta}$ + PVE $_{\alpha}$       | 1   | 0.0050 | 7.60 | 0.00605   |
| <i>residuals</i>                       | 534 | 0.352  |      |           |

668

669

670

671

672

673

674

675

676

677

678 **Table 2.** GO enrichment analysis of the leaf damage score with Fisher's exact probability  
 679 tests at FDR < 0.1. Candidate genes within ~10 kb around SNPs with the top 0.1%  
 680 association score  $-\log_{10}(\text{p-values})$  were subject to the GO analysis.

**(a) Self,  $\beta_1$**

| GO         | FDR    | Description                                          |
|------------|--------|------------------------------------------------------|
| GO:0043531 | 0.0071 | ADP binding                                          |
| GO:0009267 | 0.0083 | cellular response to starvation                      |
| GO:0031669 | 0.0083 | cellular response to nutrient levels                 |
| GO:0050662 | 0.0127 | coenzyme binding                                     |
| GO:0031668 | 0.0546 | cellular response to extracellular stimulus          |
| GO:0042594 | 0.0546 | response to starvation                               |
| GO:0071496 | 0.0673 | cellular response to external stimulus               |
| GO:0009605 | 0.0829 | response to external stimulus                        |
| GO:0004553 | 0.0829 | hydrolase activity, hydrolyzing O-glycosyl compounds |
| GO:0016798 | 0.0829 | hydrolase activity, acting on glycosyl bonds         |
| GO:0031667 | 0.0969 | response to nutrient levels                          |
| GO:0005618 | 0.0969 | cell wall                                            |
| GO:0030312 | 0.0969 | external encapsulating structure                     |
| GO:0000166 | 0.0982 | nucleotide binding                                   |
| GO:1901265 | 0.0982 | nucleoside phosphate binding                         |

**(b) Neighbor,  $\beta_2$**

| GO         | FDR    | Description                                                |
|------------|--------|------------------------------------------------------------|
| GO:0004857 | 0.0271 | enzyme inhibitor activity                                  |
| GO:0031640 | 0.0271 | killing of cells of other organism                         |
| GO:0001906 | 0.0271 | cell killing                                               |
| GO:0044364 | 0.0271 | disruption of cells of other organism                      |
| GO:0043531 | 0.0271 | ADP binding                                                |
| GO:0035821 | 0.0307 | modification of morphology or physiology of other organism |
| GO:0010393 | 0.0307 | galacturonan metabolic process                             |
| GO:0045488 | 0.0307 | pectin metabolic process                                   |
| GO:0042545 | 0.0341 | cell wall modification                                     |
| GO:0044419 | 0.0595 | interspecies interaction between organisms                 |

681

682

683

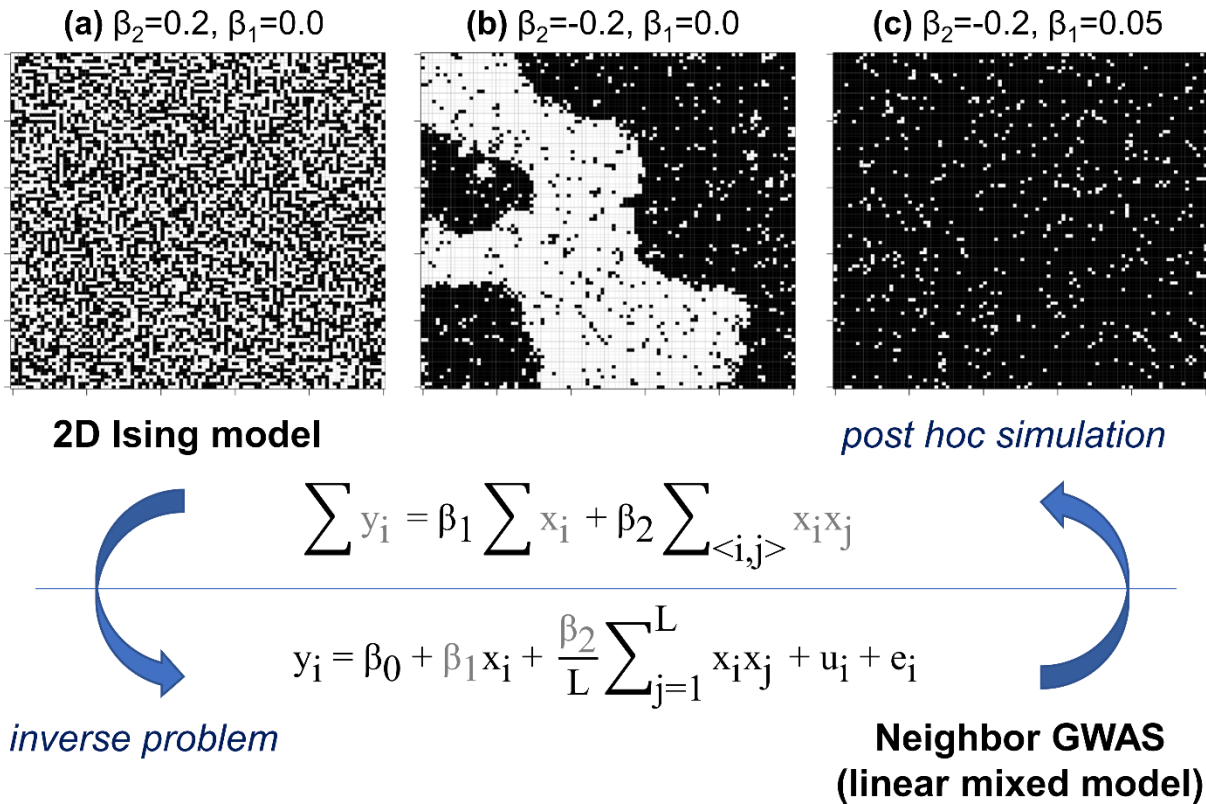

684

685 **Figure 1.** Relationship between Neighbor GWAS and Ising model. Upper panels show spatial

686 arrangements expected by a 2-D Ising model  $\sum y_i = \beta_1 \sum x_i + \beta_2 \sum_{\langle i,j \rangle} x_i x_j$ . (a) If  $\beta_2 > 0$ , mixed

687 patterns give the argument of the minimum for a population sum of phenotype values  $\sum y_i$ . (b)

688 If  $\beta_2 < 0$ , clustered patterns give the argument of the minimum for  $\sum y_i$ . (c) In addition,  $\beta_1$

689 determines overall patterns favoring -1 or +1 states. Shown are outcomes from a random  $100$

690  $\times 100$  lattice after 1000 iterations of Gibbs sampling. Conversely, the neighbor GWAS was

691 implemented as an inverse problem of the 2-D Ising model, where genotypes and its spatial

692 arrangement,  $x_i$  and  $x_i x_j$ , are given while the coefficients  $\beta_1$  and  $\beta_2$  are to be estimated from

693 observed phenotypes  $y_i$ . In addition, the variance component due to self and neighbor effects

694 was considered a random effect in a linear mixed model, such that  $u_i \sim \text{Norm}(0,$

695  $\sigma_S^2 \mathbf{K}_S + \sigma_N^2 \mathbf{K}_N)$ . Once  $\beta_1$  and  $\beta_2$  are determined, we could simulate a genotype distribution that

696 maximizes or minimizes  $\sum y_i$ .



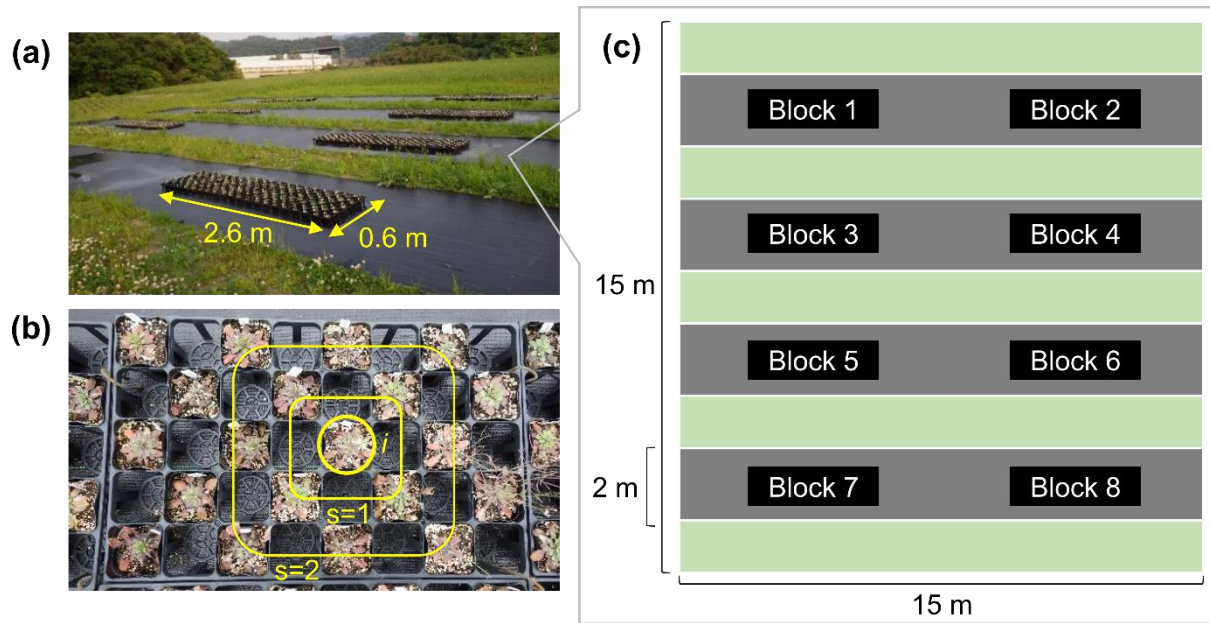

697

698 **Figure 2.** Experimental setting in the *Arabidopsis* herbivory data. (a) Photograph of the field  
699 site. Each  $0.6 \times 2.6$  m block included a replicate of 200 accessions, where  $5 \times 40$  plants were  
700 assigned to a row and column, respectively. (b) *Arabidopsis thaliana* plants were arranged in  
701 a checkerboard manner. Yellow lines represent s-th neighbor scales from a focal i-th plant. (c) A  
702 graphical explanation of the experimental area. A meadow (green) was separately covered  
703 with weed-masking sheets (grey).

704

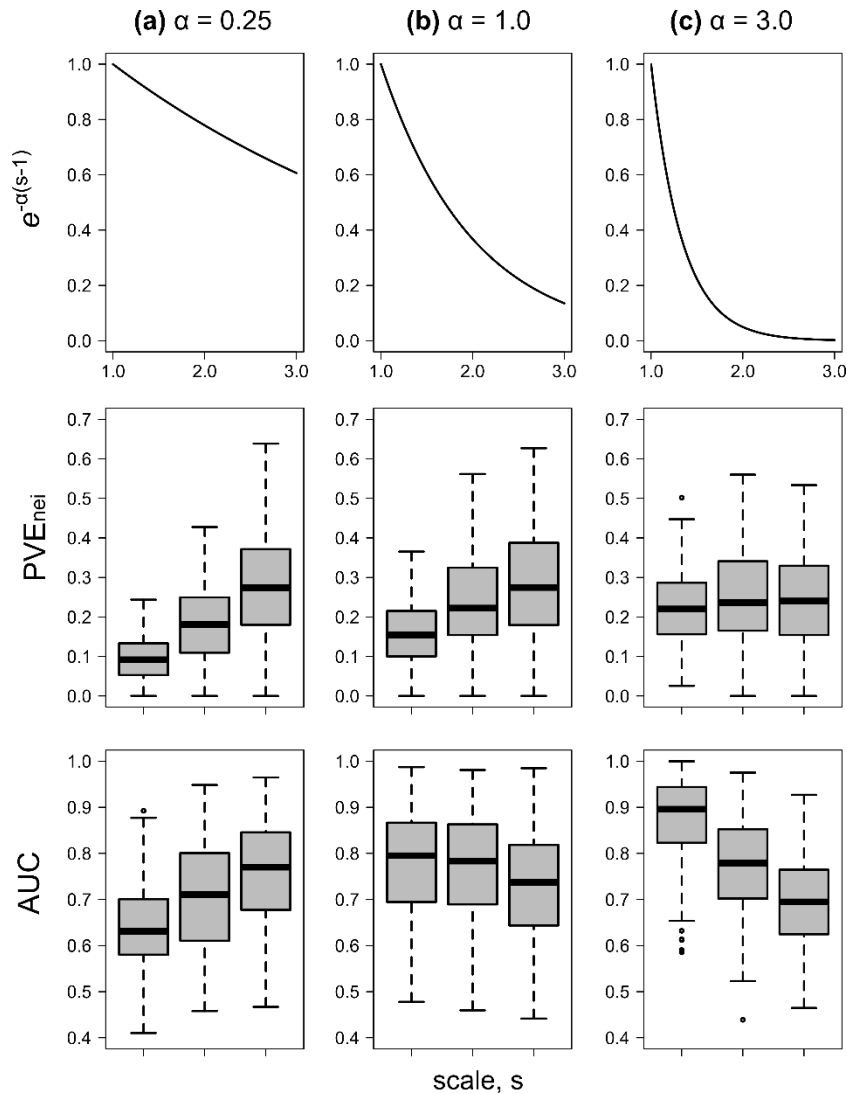

705

706 **Figure 3.** Scale dependence of neighbor effects on simulated phenotypes among all iterations

707 with the number of causal SNPs = 20. The broad (a), intermediate (b), and narrow (c)

708 effective range of neighbor effects are represented by weak, moderate, and strong distance

709 decay, respectively. The proportion of phenotypic variation explained by neighbor effects

710 ( $PVE_{nei}$ ) and the area under the ROC curve (AUC) of neighbor effects are shown along the

711 spatial scale from the first nearest ( $s = 1$ ) to the third nearest ( $s = 3$ ) neighbors. An AUC at 1.0

712 indicates a perfect detection of signals. Boxplots show center line: median, box limits: upper

713 and lower quartiles, whiskers:  $1.5 \times$  interquartile range, and points: outliers. The case for the

714 number of causal SNPs = 200 is given in Figure S1.

715

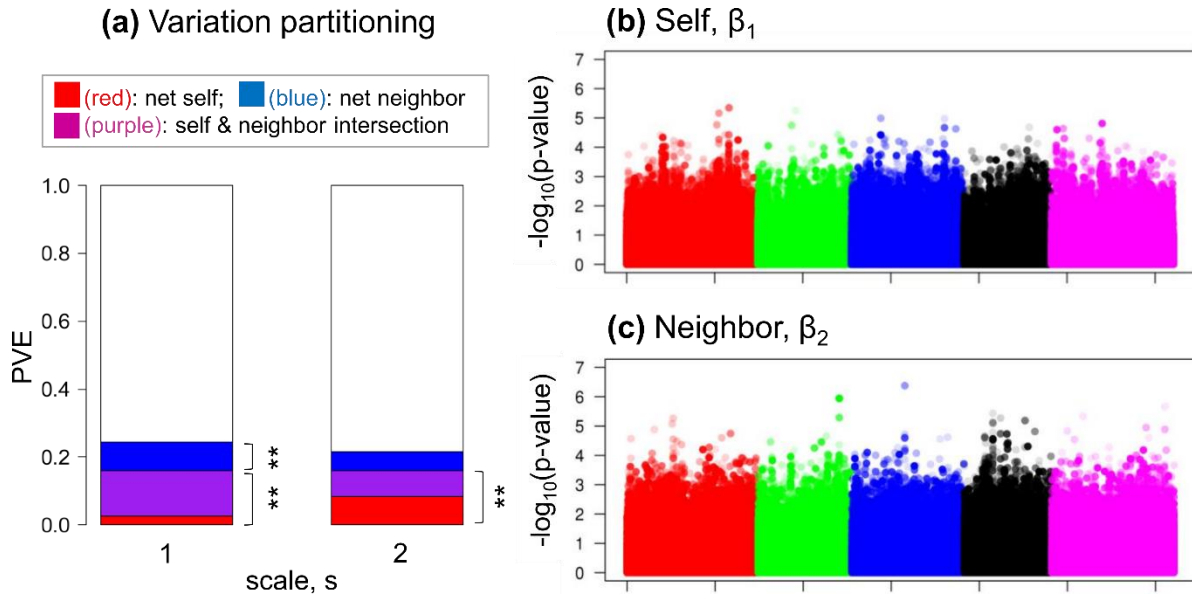

716

717 **Figure 4.** Neighbor GWAS of the leaf damage score on field-grown *Arabidopsis thaliana*. (a)

718 The proportion of leaf damage variation explained by self-genotype effects  $\text{PVE}_{\text{self}} (=$

719  $\sigma_S^2 / (\sigma_S^2 + \sigma_N^2 + \sigma_e^2)$ : blue fraction), neighbor effects  $\text{PVE}_{\text{nei}} (= \sigma_N^2 / (\sigma_S^2 + \sigma_N^2 + \sigma_e^2)$ : red fraction), and

720 residuals at the spatial scale of  $s = 1$  and  $s = 2$ . Asterisks highlight a significant fraction with

721 likelihood ratio tests: \*\* p-value < 0.01. (b, c) Manhattan plots for the self and neighbor effects

722 on the leaf damage score. Different colors highlight the first to fifth chromosomes of *A.*

723 *thaliana*. Lighter plots indicate smaller MAF. Results of neighbor effects are shown at  $s = 1$ .

724

725

726

727

(a) Chr 2, Position 14679190:  $\beta_1 = 0.15$ ,  $\beta_2 = 0.26$ ,  $\Sigma y_i = -176$

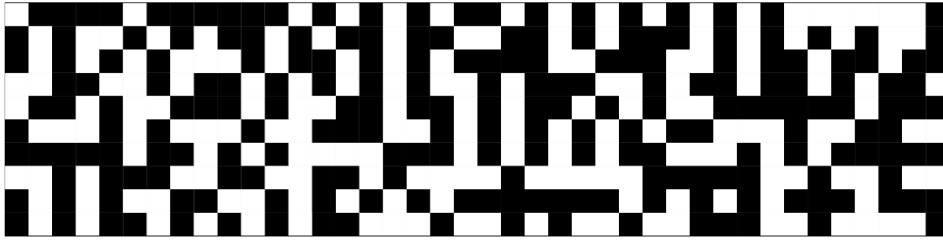

(b) Chr 2, Position 9422409:  $\beta_1 = -0.003$ ,  $\beta_2 = -0.18$ ,  $\Sigma y_i = -290$

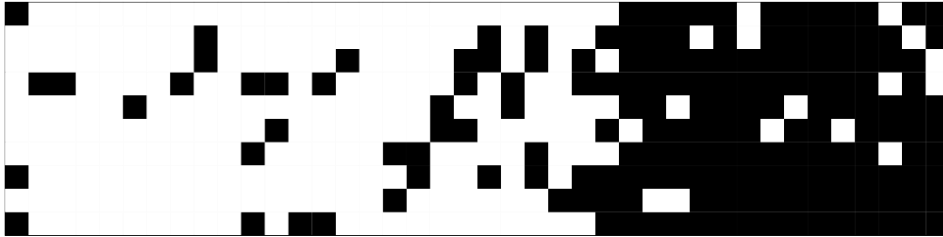

(c) Chr 5, Position 19121831:  $\beta_1 = 0.13$ ,  $\beta_2 = -0.24$ ,  $\Sigma y_i = -650$

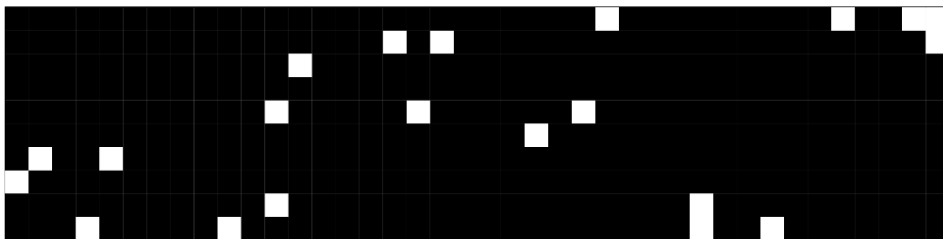

(d) No effects:  $\beta_1 = 10^{-6}$ ,  $\beta_2 = 10^{-6}$ ,  $\Sigma y_i = 10^{-4}$

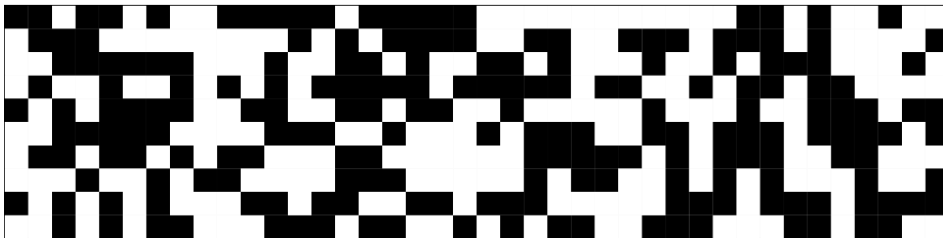

728

729 **Figure 5.** Post hoc simulations exemplifying a spatial arrangement of two alleles expected by

730 the estimated self and neighbor effects,  $\beta_1$  and  $\beta_2$ , on the leaf damage score of *Arabidopsis*

731 *thaliana*. Population sum of the leaf damage  $\Sigma y_i = \beta_1 \Sigma x_i + \beta_2 \Sigma_{\langle i,j \rangle} x_i x_j$  was minimized

732 using 1000 iterations of Gibbs sampling from a random distribution of two alleles in a  $10 \times$

733 40 space.

734

735
