# 1 Neighbor GWAS: incorporating neighbor genotypic identity 2 into genome-wide association studies of field herbivory

3

4 Yasuhiro Sato<sup>1,2</sup>, Eiji Yamamoto<sup>1,3</sup>, Kentaro K. Shimizu<sup>4,5\*</sup>, Atsushi J.  
5 Nagano<sup>6\*</sup>

6

7 <sup>1</sup>PRESTO, Japan Science and Technology Agency, Kawaguchi 332-0012,  
8 Japan

9 <sup>2</sup>Research Institute for Food and Agriculture, Ryukoku University, Yokotani  
10 1-5, Seta Oe-cho, Otsu, Shiga 520-2194, Japan

11 <sup>3</sup>Graduate School of Agriculture, Meiji University, Higashi-Mita 1-1-1,  
12 Tama-ku, Kawasaki, Kanagawa 214-8571, Japan

13 <sup>4</sup>Department of Evolutionary Biology and Environmental Studies,  
14 University of Zurich, Winterthurerstrasse 190, 8057 Zurich, Switzerland

15 <sup>5</sup>Kihara Institute for Biological Research, Yokohama City University,  
16 641-12 Maioka, 244-0813 Totsuka-ward, Yokohama, Japan

17 <sup>6</sup>Faculty of Agriculture, Ryukoku University, Yokotani 1-5, Seta Oe-cho,  
18 Otsu, Shiga 520-2194, Japan

19 \*Co-correspondence:

20 Atsushi J. Nagano

21 [anagano@agr.ryukoku.ac.jp](mailto:anagano@agr.ryukoku.ac.jp)

22 Kentaro K. Shimizu

23 [kentaro.shimizu@ieu.uzh.ch](mailto:kentaro.shimizu@ieu.uzh.ch)

24

25 **Running head:** Neighbor GWAS of herbivory

26

27

## 28 **ABSTRACT**

29 An increasing number of field studies have shown that the phenotype of an

30 individual plant depends not only on its genotype but also on those of

31 neighboring plants; however, this fact is not taken into consideration in

32 genome-wide association studies (GWAS). Based on the Ising model of

33 ferromagnetism, we incorporated neighbor genotypic identity into a

34 regression model, named “Neighbor GWAS”. Our simulations showed that

35 the effective range of neighbor effects could be estimated using an observed

36 phenotype from when the proportion of phenotypic variation explained

37 (PVE) by neighbor effects peaked. The spatial scale of the first nearest

38 neighbors gave the maximum power to detect the causal variants

39 responsible for neighbor effects, unless their effective range was too broad.

40 However, if the effective range of the neighbor effects was broad and minor

41 allele frequencies were low, there was collinearity between the self and

42 neighbor effects. To suppress the false positive detection of neighbor effects,

43 the fixed effect and variance components involved in the neighbor effects

44 should be tested in comparison with a standard GWAS model. We applied

neighbor GWAS to field herbivory data from 199 accessions of *Arabidopsis thaliana* and found that neighbor effects explained 8% more of the PVE of the observed damage than standard GWAS. The neighbor GWAS method provides a novel tool that could facilitate the analysis of complex traits in spatially structured environments and is available as an R package at CRAN (<https://cran.rproject.org/package=rNeighborGWAS>).

## INTRODUCTION

Plants are immobile and thus cannot escape their neighbors. In natural and agricultural systems, individual phenotypes depend not only on the plants' own genotype but also on the genotypes of other neighboring plants (Tahvanainen and Root 1972; Barbosa et al. 2009; Underwood et al. 2014). This phenomenon has been termed neighbor effects or associational effects in plant ecology (Barbosa et al. 2009; Underwood et al. 2014; Sato 2018). Such neighbor effects were initially reported as a form of interspecific interaction among different plant species (Tahvanainen and Root 1972), but many studies have illustrated that neighbor effects occur among different genotypes within a plant species with respect to: (i) herbivory (Schuman et al. 2015; Sato 2018; Ida et al. 2018), (ii) pathogen infections (Mundt 2002; Zeller et al. 2012), and (iii) pollinator visitations (Underwood et al. 2020). Although neighbor effects are of considerable interest in plant science

67 (Dicke and Baldwin 2010; Erb 2018) and agriculture (Zeller et al. 2012;  
68 Dahlin et al. 2018), they are often not considered in quantitative genetic  
69 analyses of field-grown plants.

70         Complex mechanisms underlie neighbor effects through direct  
71 competition (Weiner 1990), herbivore and pollinator movement (Bergvall et  
72 al. 2006; Verschut et al. 2016; Underwood et al. 2020), and volatile  
73 communication among plants (Schuman et al. 2015; Dahlin et al. 2018). For  
74 example, lipoxygenase (*LOX*) genes govern jasmonate-mediated volatile  
75 emissions in wild tobacco (*Nicotiana attenuata*) that induce defenses of  
76 neighboring plants (Schuman et al. 2015). Even if direct plant–plant  
77 communications are absent, herbivores can mediate indirect interactions  
78 between plant genotypes (Sato and Kudoh 2017; Ida et al. 2018). For  
79 example, the *GLABRA1* gene is known to determine hairy or glabrous  
80 phenotypes in *Arabidopsis* plants (Hauser et al. 2001), and the flightless leaf  
81 beetle (*Phaedon brassicae*) is known to prefer glabrous plants to hairy ones  
82 (Sato et al. 2017). Consequently, hairy plants escape herbivory when  
83 surrounded by glabrous plants (Sato and Kudoh 2017). Yet, there are few  
84 hypothesis-free approaches currently available for the identification of the  
85 key genetic variants responsible for plant neighborhood effects.

86         Genome-wide association studies (GWAS) have been increasingly  
87 adopted to resolve the genetic architecture of complex traits in the model  
88 plant, *Arabidopsis thaliana* (Atwell et al. 2010; Seren et al. 2017; Togninalli

89 et al. 2018), and crop species (Hamblin et al. 2011). The interactions of  
 90 plants with herbivores (Brachi et al. 2015; Nallu et al. 2018), microbes  
 91 (Horton et al. 2014; Wang et al. 2018), and other plant species (Frachon et al.  
 92 2019) are examples of the complex traits that are investigated through the  
 93 lens of GWAS. To distinguish causal variants from the genome structure,  
 94 GWAS often employs a linear mixed model with kinship considered as a  
 95 random effect (Kang et al. 2008; Korte and Farlow 2013). However,  
 96 because of combinatorial explosion, it is generally impossible to test the full  
 97 set of inter-genomic locus-by-locus interactions (Gondro et al. 2013); thus,  
 98 some feasible and reasonable approach should be developed for the GWAS  
 99 of neighbor effects.

100 To incorporate neighbor effects into GWAS, we have focused on a  
 101 theoretical model of neighbor effects in magnetic fields, known as the Ising  
 102 model (Ising 1925; McCoy and Maillard 2012), which has been applied to  
 103 forest gap dynamics (Kizaki and Katori 1999; Schlicht and Iwasa 2004) and  
 104 community assembly (Azaele et al. 2010) in plant ecology. Using the Ising  
 105 analogy, we compare individual plants to a magnet: the two alleles at each  
 106 locus correspond to the north and south dipoles, and genome-wide multiple  
 107 testing across all loci is analogous to a number of parallel two-dimensional  
 108 layers. The Ising model has a clear advantage in its interpretability, such  
 109 that: (i) the optimization problem for a population sum of trait values can be  
 110 regarded as an inverse problem of a simple linear model, (ii) the sign of

111 neighbor effects determines the model's trend with regard to the generation  
112 of a clustered or checkered spatial pattern of the two states, and (iii) the  
113 self-genotypic effect determines the general tendency to favor one allele  
114 over another (Fig. 1).

115 In this study, we proposed a new methodology integrating GWAS  
116 and the Ising model, named "neighbor GWAS." The method was applied to  
117 simulated phenotypes and actual data of field herbivory on *A. thaliana*. We  
118 addressed two specific questions: (i) what spatial and genetic factors  
119 influenced the power to detect causal variants? and (ii) were neighbor  
120 effects significant sources of leaf damage variation in field-grown *A.*  
121 *thaliana*? Based on the simulation and application, we determined the  
122 feasibility of our approach to detect neighbor effects in field-grown plants.

123

## 124 MATERIALS & METHODS

125

### 126 Neighbor GWAS

127 **Basic model.** We analyzed neighbor effects in GWAS as an inverse problem  
128 of the two-dimensional Ising model, named "neighbor GWAS" hereafter  
129 (Fig. 1). We considered a situation where a plant accession has one of two  
130 alleles at each locus, and a number of accessions occupied a finite set of  
131 field sites, in a two-dimensional lattice. The allelic status at each locus was  
132 represented by  $x$ , and so the allelic status at each locus of the  $i$ -th focal plant

133 and the  $j$ -th neighboring plants was designated as  $x_{i(j)} \in \{-1, +1\}$ . Based on  
 134 a two-dimensional Ising model, we defined a phenotype value for the  $i$ -th  
 135 focal individual plant  $y_i$  as:

$$136 \quad y_i = \beta_1 x_i + \beta_2 \sum_{\langle i,j \rangle} x_i x_j \quad (1)$$

137 where  $\beta_1$  and  $\beta_2$  denoted self-genotype and neighbor effects, respectively. If  
 138 two neighboring plants shared the same allele at a given locus, the  
 139 product  $x_i x_j$  turned into  $(-1) \times (-1) = +1$  or  $(+1) \times (+1) = +1$ . If two  
 140 neighbors had different alleles, the product  $x_i x_j$  became  $(-1) \times (+1) = -1$  or  
 141  $(+1) \times (-1) = -1$ . Accordingly, the effects of neighbor genotypic identity on a  
 142 particular phenotype depended on the coefficient  $\beta_2$  and the number of the  
 143 two alleles in a neighborhood. If the numbers of identical and different  
 144 alleles were the same near a focal plant, these neighbors offset the sum of  
 145 the products between the focal plant  $i$  and all  $j$  neighbors  $\sum_{\langle i,j \rangle} x_i x_j$  and  
 146 exerted no effects on a phenotype. When we summed up the phenotype  
 147 values for the total number of plants  $n$  and replaced it as  $E = -\beta_2$ ,  $H =$   
 148  $-\beta_1$  and  $\epsilon_I = \sum y_i$ , eq. 1 could be transformed into  $\epsilon_I = -E \sum_{\langle i,j \rangle} x_i x_j -$   
 149  $H \sum x_i$ , which defined the interaction energy of a two-dimensional  
 150 ferromagnetic Ising model (McCoy and Maillard 2012). The neighbor  
 151 effect  $\beta_2$  and self-genotype effect  $\beta_1$  were interpreted as the energy  
 152 coefficient  $E$  and external magnetic effects  $H$ , respectively. An individual  
 153 plant represented a spin and the two allelic states of each locus  
 154 corresponded to a north or south dipole. The positive or negative value

155 of  $\sum x_i x_j$  indicated a ferromagnetism or paramagnetism, respectively. In this  
 156 study, we did not consider the effects of allele dominance because this  
 157 model was applied to inbred plants. However, heterozygotes could be  
 158 processed if the neighbor covariate  $x_i x_j$  was weighted by an estimated  
 159 degree of dominance in the self-genotypic effects on a phenotype.

160 **Association tests.** For association mapping, we needed to  
 161 determine  $\beta_1$  and  $\beta_2$  from the observed phenotypes and considered a  
 162 confounding sample structure as advocated by previous GWAS (e.g., Kang  
 163 et al. 2008; Korte and Farlow 2013). Extending the basic model (eq. 1), we  
 164 described a linear mixed model at an individual level as:

$$165 \quad y_i = \beta_0 + \beta_1 x_i + \frac{\beta_2}{L} \sum_{<i,j>}^L x_i x_j^{(s)} + u_i + e_i \quad (2)$$

166 where  $\beta_0$  indicated the intercept, and the term  $\beta_1 x_i$  represented fixed  
 167 self-genotype effects as tested in standard GWAS;  $\beta_2$  was the coefficient of  
 168 fixed neighbor effects. The neighbor covariate  $\sum_{<i,j>}^L x_i x_j^{(s)}$  indicated a sum  
 169 of products for all combinations between the  $i$ -th focal plant and the  $j$ -th  
 170 neighbor at the  $s$ -th spatial scale from the focal plant  $i$ , and was scaled by  
 171 the number of neighboring plants,  $L$ . The number of neighboring  
 172 plants  $L$  was dependent on the spatial scale  $s$  to be referred. Variance  
 173 components due to the sample structure of self and neighbor effects were  
 174 modeled by a random effect  $u_i \in \mathbf{u}$  and  $\mathbf{u} \sim \text{Norm}(\mathbf{0}, \sigma_1^2 \mathbf{K}_1 + \sigma_2^2 \mathbf{K}_2)$ . The  
 175 residual was expressed as  $e_i \in \mathbf{e}$  and  $\mathbf{e} \sim \text{Norm}(\mathbf{0}, \sigma_e^2)$ .



176 **Variation partitioning.** To estimate the proportion of phenotypic  
 177 variation explained (PVE) by the self and neighbor effects, we utilized  
 178 variance component parameters in linear mixed models. The  $n \times n$   
 179 variance-covariance matrices represented the similarity in self-genotypes  
 180 (i.e., kinship) and neighbor covariates among  $n$  individual plants as  $\mathbf{K}_1 =$   
 181  $\frac{1}{q-1} \mathbf{X}_1^T \mathbf{X}_1$  and  $\mathbf{K}_2 = \frac{1}{q-1} \mathbf{X}_2^T \mathbf{X}_2$ , where  $q$  indicated the number of markers. As  
 182 we defined  $x_{i(j)} \in \{+1, -1\}$ , the elements of the kinship matrix  $\mathbf{K}_1$  were  
 183 scaled to represent the proportion of marker loci shared among  $n \times n$  plants  
 184 such that  $\mathbf{K}_1 = \left(\frac{k_{ij}+1}{2}\right)$ ;  $\sigma_1^2$  and  $\sigma_2^2$  indicated variance component parameters  
 185 for the self and neighbor effects.

186 The elements of  $n$  plants  $\times q$  markers matrix  $\mathbf{X}_1$  and  $\mathbf{X}_2$  consisted of  
 187 explanatory variables for the self and neighbor effects as  $\mathbf{X}_1 =$   
 188  $(x_i)$  and  $\mathbf{X}_2 = \left(\frac{\sum_{<i,j> x_i x_j^{(s)}}}{L}\right)$ . The individual-level formula eq. 2 could also be  
 189 converted into a conventional matrix form as:

$$190 \quad \mathbf{y} = \mathbf{X}\boldsymbol{\beta} + \mathbf{Z}\mathbf{u} + \mathbf{e} \quad (3)$$

191 where  $\mathbf{y}$  was an  $n \times 1$  vector of the phenotypes;  $\mathbf{X}$  was a matrix of fixed  
 192 effects, including a unit vector, self-genotype  $x_i$ , neighbor  
 193 covariate  $\frac{\sum_{<i,j> x_i x_j^{(s)}}}{L}$ , and other confounding covariates for  $n$  plants;  $\boldsymbol{\beta}$  was a  
 194 vector that represents the coefficients of the fixed effects;  $\mathbf{Z}$  was a design  
 195 matrix allocating individuals to a genotype, and became an identity matrix if

all plants were different accessions;  $\mathbf{u}$  was the random effect with  $\text{Var}(\mathbf{u})$   
 $= \sigma_1^2 \mathbf{K}_1 + \sigma_2^2 \mathbf{K}_2$ ; and  $\mathbf{e}$  was residual as  $\text{Var}(\mathbf{e}) = \sigma_e^2 \mathbf{I}$ .

Because our objective was to test for neighbor effects, we needed to  
avoid the detection of false positive neighbor effects. The self-genotype  
value  $x_i$  and neighbor genotypic identity  $\sum_{<i,j>}^L x_i x_j^{(s)}$  would be colinear due  
to the minor allele frequency (MAF) and the spatial scale of  $s$ . When MAF  
is low, neighbors  $x_j^{(s)}$  are unlikely to vary in space and most plants will  
have similar values for neighbor identity  $\sum_{<i,j>}^L x_i x_j^{(s)}$ . Furthermore, if the  
neighbor effects range was broad enough to encompass an entire field  
(i.e.,  $s \rightarrow \infty$ ), the neighbor covariate and self-genotype  $x_i$  would become  
colinear according to the equation:  $(\sum_{<i,j>}^L x_i x_j^{(s)})/L = x_i (\sum_{j=1}^L x_j^{(s)})/L =$   
 $x_i \bar{x}_j$ , where  $\bar{x}_j$  indicates a population-mean of neighbor genotypes and  
corresponds to a population-mean of self-genotype values  $\bar{x}_i$ , if  $s \rightarrow \infty$ . The  
standard GWAS is a subset of the neighbor GWAS and these two models  
become equivalent at  $s = 0$  and  $\sigma_2^2 = 0$ . When testing the self-genotype  
effect  $\beta_1$ , we recommend that the neighbor effects and its variance  
component  $\sigma_2^2$  should be excluded; otherwise, the standard GWAS fails to  
correct a sample structure because of the additional variance component  
at  $\sigma_2^2 \neq 0$ . To obtain a conservative conclusion, the significance of  $\beta_2$  and  
 $\sigma_2^2$  should be compared using the standard GWAS model based on  
self-effects alone.

217           Given the potential collinearity between the self and neighbor  
 218 effects, we defined different metrics for the proportion of phenotypic  
 219 variation explained (PVE) based on self or neighbor effects. Using a  
 220 single-random effect model, we calculated PVE for either the self or  
 221 neighbor effects as follows:  
 222 ‘single’  $PVE_{\text{self}} = \sigma_1^2 / (\sigma_1^2 + \sigma_e^2)$  when  $s$  and  $\sigma_2^2$  were set at 0, or  
 223 ‘single’  $PVE_{\text{nei}} = \sigma_2^2 / (\sigma_2^2 + \sigma_e^2)$  when  $\sigma_1^2$  was set at 0.  
 224 Furthermore, we could partial out either of the two variance components  
 225 using a two-random effect model and define PVE as:  
 226 ‘partial’  $PVE_{\text{self}} = \sigma_1^2 / (\sigma_1^2 + \sigma_2^2 + \sigma_e^2)$  and  
 227 ‘partial’  $PVE_{\text{nei}} = \sigma_2^2 / (\sigma_1^2 + \sigma_2^2 + \sigma_e^2)$ .  
 228 As the partial  $PVE_{\text{self}}$  was equivalent to the single  $PVE_{\text{self}}$  when  $s$  was set at  
 229 0, the net contribution of neighbor effects at  $s \neq 0$  was given as  
 230 ‘net’  $PVE_{\text{nei}} = (\text{partial } PVE_{\text{self}} + \text{partial } PVE_{\text{nei}}) - \text{single } PVE_{\text{self}}$ ,  
 231 which indicated the proportion of phenotypic variation that could be  
 232 explained by neighbor effects, but not by the self-genotype effects.

233

## 234 **Simulation**

235 To examine the model performance, we applied the neighbor GWAS to  
 236 simulated phenotypes. Phenotypes were simulated using a subset of the  
 237 actual *A. thaliana* genotypes. To evaluate the performance of the simple  
 238 linear model, we assumed a complex ecological form of neighbor effects

239 with multiple variance components controlled. The model performance was  
 240 evaluated in terms of the causal variant detection and accuracy of estimates.  
 241 All analyses were performed using R version 3.6.0 (R Core Team 2019).  
 242 **Genotype data.** To consider a realistic genetic structure in the  
 243 simulation, we used part of the *A. thaliana* RegMap panel (Horton et al.  
 244 2012). The genotype data for 1,307 accessions were downloaded from the  
 245 Joy Bergelson laboratory website  
 246 ([http://bergelson.uchicago.edu/?page\\_id=790](http://bergelson.uchicago.edu/?page_id=790) accessed on February 9, 2017).  
 247 We extracted data for chromosomes 1 and 2 with MAF at >0.1, yielding a  
 248 matrix of 1,307 plants with 65,226 single nucleotide polymorphisms (SNPs).  
 249 Pairwise linkage disequilibrium (LD) among the loci was  $r^2 = 0.003$   
 250 [0.00-0.06: median with upper and lower 95 percentiles]. Before generating  
 251 a phenotype, genotype values at each locus were standardized to a mean of  
 252 zero and a variance of 1. Subsequently, we randomly selected 1,296  
 253 accessions (=  $36 \times 36$  accessions) without any replacements for each  
 254 iteration and placed them in a  $36 \times 72$  checkered space, following the  
 255 *Arabidopsis* experimental settings (see Fig. S1).  
 256 **Phenotype simulation.** To address ecological issues specific to  
 257 plant neighborhood effects, we considered two extensions, namely  
 258 asymmetric neighbor effects and spatial scales. Previous studies have shown  
 259 that plant–plant interactions between accessions are sometimes asymmetric  
 260 under herbivory (e.g., Bergvall et al. 2006; Verschut et al. 2016; Sato and

261 Kudoh 2017) and height competition (Weiner 1990); where one focal  
 262 genotype is influenced by neighboring genotypes, while another receives no  
 263 neighbor effects. Such asymmetric neighbor effects can be tested by  
 264 statistical interaction terms in a linear model (Bergvall et al. 2006; Sato and  
 265 Kudoh 2017). Several studies have also shown that the strength of neighbor  
 266 effects depends on spatial scales (Hambäck et al. 2014), and that the scale of  
 267 neighbors to be analyzed relies on the dispersal ability of the causative  
 268 organisms (see Hambäck et al. 2009; Sato and Kudoh 2015; Verschut et al.  
 269 2016; Ida et al. 2018 for insect and mammal herbivores; Rieux et al. 2014  
 270 for pathogen dispersal) or the size of the competing plants (Weiner 1990).  
 271 We assumed the distance decay at the  $s$ -th sites from a focal individual  $i$   
 272 with the decay coefficient  $\alpha$  as  $w(s, \alpha) = e^{-\alpha(s-1)}$ , since such an  
 273 exponential distance decay has been widely adopted in empirical studies  
 274 (Devaux et al. 2007; Carrasco et al. 2010; Rieux et al. 2014; Ida et al. 2018).  
 275 Therefore, we assumed a more complex model for simulated phenotypes  
 276 than the model for neighbor GWAS as follows:

$$277 \quad y_i = \beta_0 + \beta_1 x_i + \frac{\beta_2}{L} \sum_{<i,j>}^L w(s, \alpha) x_i x_j^{(s)} + \beta_{12} \frac{x_i}{L} \sum_{<i,j>}^L w(s, \alpha) x_i x_j^{(s)} +$$

$$278 \quad u_i + e_i \quad (4)$$

279 where  $\beta_{12}$  was the coefficient for asymmetry in neighbor effects. By  
 280 incorporating an asymmetry coefficient, the model (eq. 4) can deal with  
 281 cases where neighbor effects are one-sided or occur irrespective of a focal  
 282 genotype (Fig. 2). Total variance components resulting from three

background effects (i.e., the self, neighbor, and self-by-neighbor effects) were defined as  $u_i \in \mathbf{u}$  and  $\mathbf{u} \sim \text{Norm}(\mathbf{0}, \sigma_1^2 \mathbf{K}_1 + \sigma_2^2 \mathbf{K}_2 + \sigma_{12}^2 \mathbf{K}_{12})$ . The three variance component parameters  $\sigma_1^2$ ,  $\sigma_2^2$ , and  $\sigma_{12}^2$ , determined the relative importance of the self-genotype, neighbor, and asymmetric neighbor effects in  $u_i$ . Given the elements of  $n$  plants  $\times$   $q$  marker explanatory matrix with  $\mathbf{X}_{12} = (\frac{x_i}{L} \sum_{<i,j>}^L w(s, \alpha) x_i x_j^{(s)})$ , the similarity in asymmetric neighbor effects was calculated as  $\mathbf{K}_{12} = \frac{1}{q-1} \mathbf{X}_{12}^T \mathbf{X}_{12}$ . To control phenotypic variations, we further partitioned the proportion of phenotypic variation into those explained by the major-effect genes and variance components  $\text{PVE}_\beta + \text{PVE}_u$ , major-effect genes alone  $\text{PVE}_\beta$ , and residual error  $\text{PVE}_e$ , where  $\text{PVE}_\beta + \text{PVE}_u + \text{PVE}_e = 1$ . The *optimize* function in R was used to adjust the simulated phenotypes to the given amounts of PVE.

**Parameter setting.** Ten phenotypes were simulated with varying combination of the following parameters, including the distance decay coefficient  $\alpha$ , the proportion of phenotypic variation explained by the major-effect genes  $\text{PVE}_\beta$ , the proportion of phenotypic variation explained by major-effect genes and variance components  $\text{PVE}_\beta + \text{PVE}_u$ , and the relative contributions of self, symmetric neighbor, and asymmetric neighbor effects, i.e.,  $\text{PVE}_{\text{self}}:\text{PVE}_{\text{nei}}:\text{PVE}_{\text{s}\times\text{n}}$ . We run the simulation with different combinations, including  $\alpha = 0.01, 1.0$ , or  $3.0$ ;  $\text{PVE}_{\text{self}}:\text{PVE}_{\text{nei}}:\text{PVE}_{\text{s}\times\text{n}} = 8:1:1$ ,  $5:4:1$ , or  $1:8:1$ ; and  $\text{PVE}_\beta$  and  $\text{PVE}_\beta + \text{PVE}_u = 0.1$  and  $0.4, 0.3$  and  $0.4, 0.3$  and  $0.8$ , or  $0.6$  and  $0.8$ . The maximum reference scale was fixed at  $s = 3$ .

305 The line of simulations was repeated for 10, 50, or 300 causal SNPs to  
 306 examine cases of oligogenic and polygenic control of a trait. The non-zero  
 307 coefficients for the causal SNPs were randomly sampled from -1 or 1 digit  
 308 and then assigned, as some causal SNPs were responsible for both the self  
 309 and neighbor effects. Of the total number of causal SNPs, 15% had self,  
 310 neighbor, and asymmetric neighbor effects (i.e.,  $\beta_1 \neq 0$  and  $\beta_2 \neq$   
 311  $0$  and  $\beta_{12} \neq 0$ ); another 15% had both the self and neighbor effects, but no  
 312 asymmetry in the neighbor effects ( $\beta_1 \neq 0$  and  $\beta_2 \neq 0$  and  $\beta_{12} = 0$ );  
 313 another 35% had self-genotypic effects only ( $\beta_1 \neq 0$ ); and the remaining  
 314 35% had neighbor effects alone ( $\beta_2 \neq 0$ ). Given its biological significance,  
 315 we assumed that some loci having neighbor signals, possessed asymmetric  
 316 interactions between the neighbors ( $\beta_2 \neq 0$  and  $\beta_{12} \neq 0$ ), while the others  
 317 had symmetric interactions ( $\beta_2 \neq 0$  and  $\beta_{12} = 0$ ). Therefore, the number of  
 318 causal SNPs in  $\beta_{12}$  was smaller than that in the main neighbor effects  $\beta_2$ .  
 319 According to this assumption, the variance component  $\sigma_{12}^2$  was also assumed  
 320 to be smaller than  $\sigma_2^2$ . To examine extreme conditions and strong asymmetry  
 321 in neighbor effects, we additionally analyzed the cases with  
 322  $\text{PVE}_{\text{self}}:\text{PVE}_{\text{nei}}:\text{PVE}_{\text{s}\times\text{n}} = 1:0:0$ ,  $0:1:0$ , or  $1:1:8$ .

323 **Summary statistics.** The simulated phenotypes were fitted by eq. 2  
 324 to test the significance of coefficients  $\beta_1$  and  $\beta_2$ , and to estimate single or  
 325 partial  $\text{PVE}_{\text{self}}$  and  $\text{PVE}_{\text{nei}}$ . To deal with potential collinearity between  
 326  $x_i$  and neighbor genotypic identity  $\sum_{<i,j>}^L x_i x_j^{(s)}$ , we performed likelihood

ratio tests between the self-genotype effect model and the model with both self and neighbor effects, which resulted in conservative tests of significance for  $\beta_2$  and  $\sigma_2^2$ . The simulated phenotype values were standardized to have a mean of zero and a variance of 1, where true  $\beta$  was expected to match the estimated coefficients  $\hat{\beta}$  when multiplied by the standard deviation of non-standardized phenotype values. The likelihood ratio was calculated as the difference in deviance, i.e.,  $-2 \times \log\text{-likelihood}$ , which is asymptotically  $\chi^2$  distributed with one degree of freedom. The variance components,  $\sigma_1^2$  and  $\sigma_2^2$ , were estimated using a linear mixed model without any fixed effects. To solve the mixed model with the two random effects, we used the average information restricted maximum likelihood (AI-REML) algorithm implemented in the *lmm aireml* function in the *gaston* package of R (Perdry and Dandine-Roulland 2018). Subsequently, we replaced the two variance parameters  $\sigma_1^2$  and  $\sigma_2^2$  in eq. 2 with their estimates  $\hat{\sigma}_1^2$  and  $\hat{\sigma}_2^2$  from the AI-REML, and performed association tests by solving a linear mixed model with a fast approximation, using eigenvalue decomposition (implemented in the *lmm diago* function: Perdry and Dandine-Roulland 2018). The model likelihood was computed using the *lmm diago.profile.likelihood* function. We evaluated the self and neighbor effects for association mapping based on the forward selection of the two fixed effects,  $\beta_1$  and  $\beta_2$ , as described below:

1. Computed the null likelihood with  $\sigma_1^2 \neq 0$  and  $\sigma_2^2 = 0$  in eq. 2



349 2. Tested the self-effect,  $\beta_1$ , by comparing with the null likelihood

350 3. Computed the self-likelihood with  $\hat{\sigma}_1^2$ ,  $\hat{\sigma}_2^2$ , and  $\beta_1$  using eq. 2

351 4. Tested the neighbor effects,  $\beta_2$ , by comparing with the self-likelihood

352 We also calculated PVE using the mixed model (eq. 3) without  $\beta_1$  and  $\beta_2$  as

353 follows:

354 1. Calculated single PVE<sub>self</sub> or single PVE<sub>nei</sub> by setting either  $\sigma_1^2$  or  $\sigma_2^2$  at 0.

355 2. Tested the single PVE<sub>self</sub> or single PVE<sub>nei</sub> using the likelihood ratio

356 between the null and one-random effect model

357 3. Calculated the partial PVE<sub>self</sub> and partial PVE<sub>nei</sub> by

358 estimating  $\sigma_1^2$  and  $\sigma_2^2$  simultaneously

359 4. Tested the partial PVE<sub>self</sub> and partial PVE<sub>nei</sub> using the likelihood ratio

360 between the two- and one-random effect model

361 We inspected the model performance based on causal variant

362 detection, PVE estimates, and effect size estimates. The true or false

363 positive rates between the causal and non-causal SNPs were evaluated using

364 ROC curves and area under the ROC curves (AUC) (Gage et al. 2018). An

365 AUC of 0.5 would indicate that the GWAS has no power to detect true

366 signals, while an AUC of 1.0 would indicate that all the top signals

367 predicted by the GWAS agree with the true signals. In addition, the

368 sensitivity to detect self or neighbor signals (i.e., either  $\beta_1 \neq 0$  or  $\beta_2 \neq 0$ )

369 was evaluated using the true positive rate of the ROC curves at a stringent

370 specificity level, where the false positive rate = 0.05. The roc function in the

371 pROC package (Robin et al. 2011) was used to calculate the ROC and AUC  
372 from  $-\log_{10}(p\text{-value})$ . Factors affecting the AUC or sensitivity were tested by  
373 analysis-of-variance (ANOVA) for the self or neighbor effects ( $AUC_{\text{self}}$  or  
374  $AUC_{\text{nei}}$ ; self or neighbor sensitivity). The AUC and PVE were calculated  
375 from  $s = 1$  (the first nearest neighbors) to  $s = 3$  (up to the third nearest  
376 neighbors) cases. The AUC was also calculated using standard linear models  
377 without any random effects, to examine whether the linear mixed models  
378 were superior to the linear models. We also tested the neighbor GWAS  
379 model incorporating the neighbor phenotype  $y_j^{(s)}$  instead of  $x_j^{(s)}$ . The  
380 accuracy of the total PVE estimates was defined as PVE accuracy =  
381  $(\text{estimated total PVE} - \text{true total PVE}) / \text{true total PVE}$ . The accuracy of the  
382 effect size estimates was evaluated using mean absolute errors (MAE)  
383 between the true and estimated  $\beta_1$  or  $\beta_2$  for the self and neighbor effects  
384 ( $MAE_{\text{self}}$  and  $MAE_{\text{nei}}$ ). Factors affecting the accuracy of PVE and effect size  
385 estimates were also tested using ANOVA. Misclassifications between self  
386 and neighbor fixed effects were further evaluated by comparing  $p$ -value  
387 scores between zero and non-zero coefficients. If  $-\log_{10}(p\text{-value})$  scores of  
388 zero  $\beta$  are the same or larger than non-zero  $\beta$ , it infers a risk of  
389 misspecification of the true signals.

390

### 391 ***Arabidopsis* herbivory data**

392 We applied the neighbor GWAS to field data of *Arabidopsis* herbivory. The

393 procedure for this field experiment followed that of our previous experiment  
 394 (Sato et al. 2019). We selected 199 worldwide accessions from 2029  
 395 accessions sequenced by the RegMap (Horton et al. 2012) and 1001  
 396 Genomes project (Alonso-Blanco et al. 2016). Of the 199 accessions, most  
 397 were overlapped with a previous GWAS of biotic interactions (Horton et al.  
 398 2014) and half were included by a GWAS of glucosinolates (Chan et al.  
 399 2010). Eight replicates of each of the 199 accessions were first prepared in a  
 400 laboratory and then transferred to the outdoor garden at the Center for  
 401 Ecological Research, Kyoto University, Japan (Otsu, Japan: 35°06'N,  
 402 134°56'E, alt. ca. 200 m: Fig. S1). Seeds were sown on Jiffy-seven pots  
 403 (33-mm diameter) and stratified at a temperature of 4 °C for a week.  
 404 Seedlings were cultivated for 1.5 months under a short-day condition (8 h  
 405 light: 16 h dark, 20 °C). Plants were then separately potted in plastic pots (6  
 406 cm in diameter) filled with mixed soil of agricultural compost (Metro-mix  
 407 350, SunGro Co., USA) and perlite at a 3:1 ratio. Potted plants were set in  
 408 plastic trays (10 × 40 cells) in a checkered pattern (Fig. S1). In the field  
 409 setting, a set of 199 accessions and an additional Col-0 accession were  
 410 randomly assigned to each block without replacement (Fig. S1). Eight  
 411 replicates of these blocks were set >2 m apart from each other (Fig. S1).  
 412 Potted plants were exposed to the field environment for 3 wk in June 2017.  
 413 At the end of the experiment, the percentage of foliage eaten was scored as:  
 414 0 for no visible damage, 1 for  $\leq 10\%$ , 2 for  $>10\%$  and  $\leq 25\%$ , 3 for  $> 25\%$

415 and  $\leq 50\%$ , 4 for  $>50\%$  and  $\leq 75\%$ , and 5 for  $>75\%$ . All plants were scored  
416 by a single person to avoid observer bias. The most predominant herbivore  
417 in this field trial was the diamond back moth (*Plutella xylostella*), followed  
418 by the small white butterfly (*Pieris rapae*). We also recorded the initial plant  
419 size and the presence of inflorescence to incorporate them as covariates.  
420 Initial plant size was evaluated by the length of the largest rosette leaf (mm)  
421 at the beginning of the field experiment and the presence of inflorescence  
422 was recorded 2 wk after transplanting.

423         We estimated the variance components and performed the  
424 association tests for the leaf damage score with the neighbor covariate at  $s =$   
425 1 and 2. These two scales corresponded to  $L = 4$  (the nearest four neighbors)  
426 and  $L = 12$  (up to the second nearest neighbors), respectively, in the  
427 *Arabidopsis* dataset. The variation partitioning and association tests were  
428 performed using the *gaston* package, as mentioned above. To determine the  
429 significance of the variance component parameters, we compared the  
430 likelihood between mixed models with one or two random effects. For the  
431 genotype data, we used an imputed SNP matrix of the 2029 accessions  
432 studied by the RegMap (Horton et al. 2012) and 1001 Genomes project  
433 (Alonso-Blanco et al. 2016). Missing genotypes were imputed using  
434 BEAGLE (Browning and Browning 2009), as described by Togninalli et al.  
435 (2018) and updated on the AraGWAS Catalog  
436 (<https://aragwas.1001genomes.org>). Of the 10,709,466 SNPs from the full

437 imputed matrix, we used 1,242,128 SNPs with MAF at  $> 0.05$  and LD of  
 438 adjacent SNPs at  $r^2 < 0.8$ . We considered the initial plant size, presence of  
 439 inflorescence, experimental blocks, and the edge or center within a block as  
 440 fixed covariates; these factors explained 12.5% of the leaf damage variation  
 441 (1.2% by initial plant size, Wald test,  $Z = 3.53$ ,  $p\text{-value} < 0.001$ ; 2.4% by the  
 442 presence of inflorescence,  $Z = -5.69$ ,  $p\text{-value} < 10^{-8}$ ; 8.3% by the  
 443 experimental blocks, likelihood ratio test,  $\chi^2 = 152.8$ ,  $df = 7$ ,  $p\text{-value} < 10^{-28}$ ;  
 444 0.5% by the edge or center,  $Z = 3.11$ ,  $p\text{-value} = 0.002$ ). After the association  
 445 mapping, we searched candidate genes within  $\sim 10$  kb around the target  
 446 SNPs, based on the Araport11 gene model with the latest annotation of The  
 447 Arabidopsis Information Resource (TAIR) (accessed on 7 September 2019).  
 448 Gene-set enrichment analysis was performed using the Gowinda algorithm  
 449 that enables unbiased analysis of the GWAS results (Kofler and Schlotterer  
 450 2012). We tested the SNPs with the top 0.1%  $-\log_{10}(p\text{-value})$  scores, with the  
 451 option “--gene-definition undownstream10000,” “--min-genes 20,” and  
 452 “--mode gene.” The GO.db package (Carlson et al. 2018) and the latest  
 453 TAIR AGI code annotation were used to build input files. The R source  
 454 codes, accession list, and phenotype data are available at the GitHub  
 455 repository (<https://github.com/naganolab/NeighborGWAS>).

456

#### 457 **R package, “rNeighborGWAS”**

458 To increase the availability of the new method, we have developed the

neighbor GWAS into an R package, which is referred to as “rNeighborGWAS”. In addition to the genotype and phenotype data, the package requires a spatial map indicating the positions of individuals across a space. In this package, we generalized the discrete space example into a continuous two-dimensional space, allowing it to handle any spatial distribution along the x- and y-axes. Based on the three input files, the rNeighborGWAS package estimates the effective range of neighbor effects by calculating partial  $PVE_{nei}$  and performs association mapping of the neighbor effects using the linear mixed models described earlier. Details and usage are described in the help files and vignette of the rNeighborGWAS package available via CRAN at <https://cran.r-project.org/package=rNeighborGWAS>.

To assess its implementation, we performed standard GWAS using GEMMA version 0.98 (Zhou and Stephens 2012) and the rNeighborGWAS. The test phenotype data were the leaf damage scores for the 199 accessions described previously and their flowering times under long-day conditions (“FT16” phenotype collected by Atwell et al. 2010 and Alonso-Blanco et al. 2016). The flowering time phenotype was downloaded from the AraPheno database (<https://arapheno.1001genomes.org/>; Seren et al. 2017). The full imputed genotype data were compiled for 1057 accessions, whose genotypes and flowering time phenotype were both available. The cut-off value of the MAF was set at 5%, yielding 1,814,755 SNPs for the 1057

481 accessions. The same kinship matrix defined by  $\mathbf{K}_1$  above was prepared as  
482 an input file. We calculated  $p$ -values using likelihood ratio tests in the  
483 GEMMA program, because the rNeighborGWAS adopted likelihood ratio  
484 tests.

485

## 486 **RESULTS**

487

### 488 **Simulation**

489 We conducted simulations to test the capability of the neighbor GWAS to  
490 estimate PVE and marker-effects. As expected by the model and data  
491 structure, collinearity was detected between the self-genotypic  
492 variable  $x_i$  and the neighbor variable  $\sum x_i x_j / L$  in the simulated genotypes  
493 (Fig. S2). The level of collinearity varied from a slight correlation to  
494 complete collinearity as the MAF became smaller, from 0.5 to 0.1 (Fig. S2).  
495 The collinearity was also more severe as the scale of  $s$  was increased. For  
496 example, even at  $s = 2$ , we could cut off the MAF at  $>0.4$  to keep  $|r|$  below  
497 0.6 for all SNPs. The element-wise correlation between  $\mathbf{K}_1$  and  $\mathbf{K}_2$  indicated  
498 that at least 60% of the variation was overlapping between the two  
499 genome-wide variance-covariance matrices in the partial genotype data used  
500 for this simulation ( $R^2 = 0.62$  at  $s = 1$ ;  $R^2 = 0.79$  at  $s = 2$ ;  $R^2 = 0.84$  at  $s = 3$ ).

501 A set of phenotypes were then simulated from the real genotype  
502 data following a complex model (eq. 4), and then fitted using a simplified

503 model (eq. 2). The accuracy of the total PVE estimation was the most  
 504 significantly affected by the spatial scales of  $s$  (Table 1). The total PVE was  
 505 explained relatively well by the single  $PVE_{\text{self}}$  that represented the additive  
 506 polygenic effects of the self-genotypes (Fig. 3). Inclusion of partial  $PVE_{\text{nei}}$   
 507 accounted for the rest of the true total PVE, which was considered the net  
 508 contribution of neighbor effects to phenotypic variation. The net  $PVE_{\text{nei}}$  was  
 509 largest when the effective range of the neighbor effects was narrow (i.e.,  
 510 strong distance decay at  $\alpha = 3$ ) and the contribution of the partial  $PVE_{\text{nei}}$   
 511 was much larger than that of  $PVE_{\text{self}}$  (Fig. 3). However, the sum of the single  
 512  $PVE_{\text{self}}$  (= partial  $PVE_{\text{self}}$  at  $s = 0$ ) and the partial  $PVE_{\text{nei}}$  did not match the  
 513 true total PVE (Fig. 3), as expected by the collinearity between the self and  
 514 neighbor effects (Fig. S2). Due to such collinearity, the single  $PVE_{\text{self}}$  or  
 515 single  $PVE_{\text{nei}}$  mostly overrepresented the actual amounts of  $PVE_{\text{self}}$  or  
 516  $PVE_{\text{nei}}$ , respectively (Fig. S3). The overrepresentation of the single  $PVE_{\text{self}}$   
 517 and single  $PVE_{\text{nei}}$  was observed when either the self or neighbor effects  
 518 were absent in the simulation (Fig. S4). These results indicate that (i) single  
 519  $PVE_{\text{nei}}$  should not be used, (ii) partial  $PVE_{\text{nei}}$  suffered from its collinearity  
 520 with the single  $PVE_{\text{self}}$ , and (iii) net  $PVE_{\text{nei}}$  provides a conservative estimate  
 521 for the genome-wide contribution of neighbor effects to phenotypic  
 522 variation.

523           Although the partial  $PVE_{\text{nei}}$  could not be used to quantify the net  
 524 contribution of the neighbor effects, this metric inferred spatial scales at



525 which neighbor effects remained effective. If the distance decay was weak  
 526 (small value of decay coefficient  $\alpha$ ) and the effective range of the neighbor  
 527 effects was broad, partial  $PVE_{nei}$  increased linearly as the reference spatial  
 528 scale was broadened (Fig. 3). On the other hand, if the distance decay was  
 529 strong (large value of decay coefficient  $\alpha$ ) and the effective scale of the  
 530 neighbor effects was narrow, partial  $PVE_{nei}$  decreased as the reference  
 531 spatial scale was broadened or saturated at the scale of the first nearest  
 532 neighbors (Fig. 3). Considering the spatial dependency of the partial  $PVE_{nei}$ ,  
 533 we could estimate the effective spatial scales by  $\Delta PVE_{nei} = \text{partial } PVE_{nei,s+1}$   
 534  $- \text{partial } PVE_{nei,s}$  and by the scale that resulted in the maximum  $\Delta PVE_{nei}$  as  $s$   
 535  $= \arg \max \Delta PVE_{nei}$  (Fig. S5).

536 The spatial scale that yielded the maximum AUC for neighbor  
 537 effects, coincided with the patterns of the partial  $PVE_{nei}$  across the range of  $s$ .  
 538 If the distance decay was weak ( $\alpha = 0.01$ ) and the effective range of the  
 539 neighbor effects was broad, the  $AUC_{nei}$  increased linearly as the reference  
 540 spatial scale was broadened (Fig. 4). If the distance decay was strong (large  
 541 value of decay coefficient  $\alpha$ ) and the effective scale of the neighbor effects  
 542 was narrow, the  $AUC_{nei}$  did not increase even when the reference spatial  
 543 scale was broadened (Fig. 4). Thus, the first nearest scale was enough to  
 544 detect neighbor signals, unless the distance decay was very weak.

545 In terms of the AUC, we also found that the number of causal SNPs,  
 546 the amount of PVE by neighbor effects (controlled by the total  $PVE = PVE_{\beta}$

547 +  $PVE_u$ ; and ratio of  $PVE_{self}:PVE_{nei}$ ), and the distance decay coefficient  $\alpha$   
548 were significant factors affecting the power to detect neighbor signals (Table  
549 1). The power to detect self-genotype effects depended on the number of  
550 causal SNPs and  $PVE_\beta$  but was not significantly influenced by the distance  
551 decay coefficient of the neighbor effects (Table 1). The power to detect  
552 self-genotype signals changed from strong ( $AUC_{self}>0.9$ ) to weak  
553 ( $AUC_{self}<0.6$ ), depending on the number of causal SNPs, the PVE by the  
554 major-effect genes, and as the relative contribution from the  $PVE_{self}$   
555 increased (Fig. S6). Compared to the self-genotype effects, it was relatively  
556 difficult to detect neighbor effects (Fig. 4; Fig. S6), ranging from strong  
557 ( $AUC_{nei}>0.9$ ) to little ( $AUC_{nei}$  near to 0.5) power. When the number of  
558 causal SNPs = 10, the power to detect neighbor signals decreased from high  
559 ( $AUC_{nei}>0.9$ ) to moderate ( $AUC_{nei}>0.7$ ) with the decreasing  $PVE_\beta$  and the  
560 distance decay coefficient (Fig. 4; Fig. S6). There was almost no power to  
561 detect neighbor signals ( $AUC_{nei}$  near to 0.5) when the number of causal  
562 SNPs = 50 and  $PVE_{nei}$  had low contributions (Fig. S6). The result of the  
563 simulations indicated that strong neighbor effects were detectable when a  
564 target trait was governed by several major genes and the range of neighbor  
565 effects was spatially limited. Additionally, linear mixed models  
566 outperformed standard linear models as there were 8.8% and 1.4% increases  
567 in their power to detect self and neighbor signals, respectively ( $AUC_{self}$ ,  
568 paired  $t$ -test, mean of the difference = 0.088,  $p$ -value $<10^{-16}$ ;  $AUC_{nei}$ , mean of

the difference = 0.014,  $p$ -value  $< 10^{-16}$ ). When the neighbor phenotype  $y_j^{(s)}$  was incorporated instead of the genotype  $x_j^{(s)}$ , the power to detect neighbor effects was very weak, such that the  $AUC_{nei}$  decreased to almost 0.5.

To examine misclassifications between the self and neighbor signals, we compared the sensitivity, effect size estimates, and  $p$ -value scores among causal SNPs having non-zero coefficients of the true  $\beta_1$  and  $\beta_2$ . The sensitivity to detect the self and neighbor effects was largely affected by the number of causal SNPs, the amount of PVE by the major-effect genes  $PVE_\beta$ , and the relative contribution of the self and neighbor effects (controlled by  $PVE_{self}:PVE_{nei}$ ) (Table 1; Fig. S7). The mean absolute errors of the self-effect estimates for  $\hat{\beta}_1$  largely depended on the number of causal SNPs and the relative contribution of the variance components, while those of the neighbor effect estimates for  $\hat{\beta}_2$  were dependent on the relative contribution of the variance components and the spatial scales to be referred (Table 1; Fig. S8). Given that the self and neighbor signals were sufficiently detected when the number of causal SNPs was 50 (Fig. S6),  $p$ -values under this condition were compared between the causal and non-causal SNPs. We observed that strong self-signals ( $\beta_1 \neq 0$ ) were unlikely to be detected as neighbor effects (Fig. 5). Causal SNPs responsible for both the self and neighbor effects ( $\beta_1 \neq 0$  and  $\beta_2 \neq 0$ ) were better detected than the non-causal SNPs ( $\beta_1 = 0$  and  $\beta_2 = 0$ ). The

591 sensitivity to detect neighbor effects was large when the true contribution of  
592 the neighbor effects was as large as  $PVE_{\text{self}}:PVE_{\text{nei}} = 1:8$ , but decreased  
593 when the contribution of the self-effects was as large as  $PVE_{\text{self}}:PVE_{\text{nei}} = 8:1$   
594 (Fig. S7). In contrast, if the contribution of the neighbor effects was  
595 relatively large ( $PVE_{\text{self}}:PVE_{\text{nei}} = 1:8$ ), the SNPs responsible for the  
596 neighbor effects alone ( $\beta_1 = 0$  and  $\beta_2 \neq 0$ ), could also be detected as  
597 self-effects (Fig. 5). As expected by the level of collinearity (Fig. S2), the  
598 false positive detection of the self-effects was more likely when the  
599 distance decay coefficient was small, and the effective range of the neighbor  
600 effects was broad (Fig. 5). This coincided with the strength of the  
601 collinearity (Fig. S2), as the false positive detection of self-effects and false  
602 negative detection of neighbor effects are more likely if the MAF was small  
603 (Fig. S9). Consistent with the false positive detection, the sensitivity to  
604 detect self-effects remained large, even when the contribution of the  
605 neighbor effects was far larger (Fig. S7). Strong self-effects ( $p\text{-value} < 10^{-5}$   
606 for  $\hat{\beta}_1$ ) and slight neighbor effects ( $p\text{-value} < 0.05$  for  $\hat{\beta}_2$  at  $s = 1$  and  $\alpha = 3$ )  
607 remained when asymmetric neighbor effects were strong ( $\beta_1 \neq 0$  and  $\beta_2 \neq$   
608  $0$  and  $\beta_{12} \neq 0$  and  $PVE_{\text{self}}:PVE_{\text{nei}}:PVE_{\text{sxn}} = 1:1:8$ ; Fig. S10). These results  
609 indicate that (i) the collinearity may lead to the false positive detection of  
610 self-effects, yet is unlikely to result in the false positive detection of  
611 neighbor effects, and that (ii) smaller MAFs are more likely to cause the  
612 false positive detection of self-effects and decrease the power to detect true

613 neighbor effects.

614

# 615 ***Arabidopsis* herbivory data**

616 To estimate  $PVE_{\text{self}}$  and  $PVE_{\text{nei}}$ , we applied a linear mixed model (eq. 3) to  
617 the leaf damage score data for the field-grown *A. thaliana*. The leaf damage  
618 variation was significantly explained by the single  $PVE_{\text{self}}$  that represented  
619 additive genetic variation (single  $PVE_{\text{self}} = 0.173$ ,  $\chi^2_1 = 10.1$ ,  $p\text{-value} =$   
620  $0.005$ ). Variation partitioning showed a significant contribution of neighbor  
621 effects to the phenotypic variation in the leaf damage at the nearest scale  
622 (partial  $PVE_{\text{nei}} = 0.214$ ,  $\chi^2_1 = 7.23$ ,  $p\text{-value} = 0.004$  at  $s = 1$ : Fig. S11). The  
623 proportion of phenotypic variation explained by the neighbor effects did not  
624 increase when the neighbor scale was referred up to the nearest and second  
625 nearest individuals (partial  $PVE_{\text{nei}} = 0.14$ ,  $\chi^2_1 = 1.41$ ,  $p\text{-value} = 0.166$  at  $s =$   
626  $2$ : Fig. S11); therefore, the effective scale of the neighbor effects was  
627 estimated at  $s = 1$  and variation partitioning was stopped at  $s = 2$ . These  
628 results indicated that the effective scale of the neighbor effects on the leaf  
629 damage was narrow ( $s = 1$ ) and the net  $PVE_{\text{nei}}$  at  $s = 1$  explained an  
630 additional 8% of the PVE compared to the additive genetic variation  
631 attributable to the single  $PVE_{\text{self}}$  (Fig. 6a). The genotype data had moderate  
632 to strong element-wise correlation between  $K_1$  and  $K_2$  in these analyses ( $r =$   
633  $0.60$  and  $0.78$  at  $s = 1$  and  $2$  among 199 accessions with eight replicates).  
634 We additionally incorporated the neighbor phenotype  $y_j^{(s)}$  instead of the

neighbor genotype  $x_j^{(s)}$  in eq. 2, but the partial  $PVE_{nei}$  did not increase (partial  $PVE_{nei} = 0.066$  and  $0.068$  at  $s = 1$  and  $2$ , respectively).

The standard GWAS of the self-genotype effects on the leaf damage detected the SNPs with the second and third largest  $-\log_{10}(p\text{-values})$  scores, on the first chromosome (chr1), though they were not above the threshold for Bonferroni correction (Fig. 6b; Table S2). The second SNP at chr1-21694386 was located within  $\sim 10$  kb of the three loci encoding a disease resistance protein (CC-NBS-LRR class) family. The third SNP at chr1-23149476 was located within  $\sim 10$  kb of the AT1G62540 locus that encodes a flavin-monooxygenase glucosinolate S-oxygenase 2 (FMO GS-OX2). No GOs were significantly enriched for the self-effects on herbivory (false discovery rate  $> 0.08$ ). A QQ-plot did not exhibit an inflation of  $p$ -values for the self-genotype effects (Fig. S12).

Regarding the neighbor effects on leaf damage, we found non-significant but weak peaks on the second and third chromosomes (Fig. 6c; Table S2). The second chromosomal region had higher association scores than those predicted by the QQ-plot (Fig. S12). A locus encoding FAD-binding Berberine family protein (AT2G34810 named *BBE16*), which is known to be up-regulated by methyl jasmonate (Devoto et al. 2005), was located within the  $\sim 10$  kb window near SNPs with the top eleven  $-\log_{10}(p\text{-values})$  scores on the second chromosome. Three transposable elements and a pseudogene of lysyl-tRNA synthetase 1 were located near

657 the most significant SNP on the third chromosome. No GOs were  
658 significantly enriched for the self-effects on herbivory (false discovery rate  
659  $> 0.9$ ). We additionally tested the asymmetric neighbor effects of  $\beta_{12}$  in the  
660 real dataset on field herbivory, but the top 0.1% of the SNPs for the  
661 neighbor effects for  $\beta_2$ , did not overlap with those of the asymmetric  
662 neighbor effects  $\beta_{12}$  (Table S2).

663           Based on the estimated coefficients  $\hat{\beta}_1$  and  $\hat{\beta}_2$ , we ran a post hoc  
664 simulation to infer a spatial arrangement that minimizes a population sum of  
665 the leaf damage  $\sum y_i = \beta_1 \sum x_i + \beta_2 \sum_{\langle i,j \rangle} x_i x_j$ . The constant intercept  $\beta_0$ ,  
666 the variance component  $u_i$ , and residual  $e_i$  were not considered because they  
667 were not involved in the deterministic dynamics of the model. Figure 7  
668 shows three representatives and a neutral expectation. For example, a  
669 mixture of a dimorphism was expected to decrease the total leaf damage for  
670 an SNP at chr2-14679190 near the *BBE16* locus ( $\hat{\beta}_2 > 0$ : Fig. 7a). On the  
671 other hand, a clustered distribution of a dimorphism was expected to  
672 decrease the total damage for an SNP at chr2-9422409 near the AT2G22170  
673 locus encoding a lipase/lipoxygenase PLAT/LH2 family protein ( $\hat{\beta}_1 \approx$   
674  $0, \hat{\beta}_2 < 0$ : Fig. 7b). Furthermore, a near monomorphism was expected to  
675 decrease the leaf damage for an SNP at chr5-19121831 near the AT5G47075  
676 and AT5G47077 loci encoding low-molecular cysteine-rich proteins, LCR20  
677 and LCR6 ( $\hat{\beta}_1 > 0, \hat{\beta}_2 < 0$ : Fig. 7c). If the self and neighbor coefficients  
678 had no effects, we would observe a random distribution and no mitigation of

679 damage i.e.,  $\sum y_i \approx 0$  (Fig. 7d). These post hoc simulations suggested a  
680 potential application for neighbor GWAS for the optimization of the spatial  
681 arrangements in field cultivation.  
682  
683 **Comparing self  $p$ -values between the neighbor GWAS and GEMMA**  
684 To ascertain whether the self-genotype effects in the neighbor GWAS agree  
685 with those of a standard GWAS, we compared the  $p$ -value scores between  
686 the rNeighborGWAS package and the commonly used GEMMA program  
687 (Fig. S13). For the leaf damage score, the neighbor GWAS yielded almost  
688 the same  $-\log_{10}(p\text{-values})$  scores for the self-effects as the GEMMA program  
689 ( $r = 0.9999$  among all the 1,242,128 SNPs). The standard GWAS, using the  
690 flowering time phenotype, also yielded the consistent  $-\log_{10}(p\text{-values})$  scores  
691 between the neighbor GWAS and GEMMA ( $r = 0.9999$  among all the  
692 1,814,755 SNPs; Fig. S13). Both the flowering time GWAS using the  
693 neighbor GWAS and GEMMA found two significant SNPs above the  
694 genome-wide Bonferroni threshold on chromosome 5 (chr5-18590741 and  
695 chr5-18590743, MAF = 0.49 and 0.49,  $-\log_{10}(p\text{-value}) = 7.797$  and  $7.797$  for  
696 the neighbor GWAS; chr5-18590741 and chr5-18590743, MAF = 0.49 and  
697 0.49,  $-\log_{10}(p\text{-value}) = 7.798$  and  $7.798$  for GEMMA), which were located  
698 within the *Delay of Germination 1 (DOG1)* locus, that was reported  
699 previously by Alonso-Blanco et al. (2016). Another significant SNP was  
700 observed at the top of chromosome 4 (chr4-317979, MAF = 0.12,



701  $-\log_{10}(p\text{-value}) = 7.787$  and  $7.933$  for the neighbor GWAS and GEMMA),  
 702 which was previously identified as a quantitative trait loci underlying  
 703 flowering time in long-day conditions (Aranzana et al. 2005).

704

705

## 706 **DISCUSSION**

707

### 708 **Spatial and genetic factors underlying simulated phenotypes**

709 Benchmark tests using simulated phenotypes revealed that appropriate  
 710 spatial scales could be estimated using the partial  $PVE_{nei}$  of the observed  
 711 phenotypes. When the scale of the neighbor effects was narrow or moderate  
 712 ( $\alpha = 1.0$  or  $3.0$ ), the scale of the first nearest neighbors would be optimum  
 713 for increasing the AUC to detect neighbor signals. In terms of the neighbor  
 714 effects in the context of plant defense, mobile animals (e.g., mammalian  
 715 browsers and flying insects) often select a cluster of plant individuals (e.g.,  
 716 Bergvall et al. 2006; Hambäck et al. 2009; Sato and Kudoh 2015; Verschut  
 717 et al. 2016). In this case, the neighbor effects could not be observed among  
 718 individual plants within a cluster (Sato and Kudoh 2015). The exponential  
 719 distance decay at  $\alpha = 0.01$  represented situations in which the effective  
 720 range of the neighbor effects was too broad to be detected; only in such  
 721 situations should more than the nearest neighbors be referred to, to gain the  
 722 power to detect neighbor effects. We also considered the asymmetric

723 neighbor effects where the neighbor genotype similarity had significant  
724 effects on one genotype, but not on another genotype. In this situation,  
725 strong self-effects could be observed when the symmetric neighbor effects  
726 were weakened. This additional result suggests that asymmetric neighbor  
727 effects should be tested if strong self-effects and weak symmetric neighbor  
728 effects are both detected at a single locus.

729         Neighbor effects are more likely to contribute to phenotypic  
730 variation when its effective range becomes narrow due to a strong distance  
731 decay ( $\alpha = 3$ ), as suggested by the net  $PVE_{nei}$ . However, the total  
732 phenotypic variation was explained relatively well by the single  $PVE_{self}$  that  
733 represented additive polygenic effects. Previous studies showed that genetic  
734 interactions could lead to an overrepresentation of narrow-sense heritability  
735 in GWAS (e.g., Zuk et al. 2012; Young and Durbin 2014). This occurs  
736 because the SNP heritability is represented by the genetic similarity between  
737 individuals, and thereby covariance of the kinship matrix helps to fit the  
738 phenotypic variance attributable to gene-by-gene interactions (Young and  
739 Durbin 2014; Schrauf et al. 2020). This problem is also observed in the  
740 neighbor GWAS that models pairwise interactions at a focal locus among  
741 neighboring individuals. Given the difficulty in distinguishing the kinship  
742 and genetic interactions, we conclude that the non-independence of the self  
743 and neighbor effects is an intrinsic feature of the neighbor GWAS, and that  
744 the difference of the PVE between a standard and neighbor GWAS i.e., net

745 PVE<sub>nei</sub> should be used as a conservative estimate of PVE<sub>nei</sub>.

746

# 747 **Neighbor GWAS of the field herbivory on *Arabidopsis***

748 Our genetic analysis of the neighbor effects is of ecological interest, as the  
749 question of how host plant genotypes shape variations in plant–herbivore  
750 interactions, is a long-standing question in population ecology (e.g., Karban  
751 1992; Underwood and Rausher 2000; Utsumi et al. 2011). Despite the low  
752 PVE and several confounding factors under field conditions, the present  
753 study illustrated the significant contribution of neighbor genotypic identity,  
754 to the spatial variation of the herbivory on *A. thaliana*. Although the  
755 additional fraction explained by the neighbor effects was 8%, this amount  
756 was plausible in the GWAS of complex traits. For example, the variance  
757 components of epistasis explained 10-14% PVE on average for 46 traits in  
758 yeast (Young and Durbin 2014). Even when heritability is high, the  
759 significant variants have often explained a small fraction of PVE, which is  
760 known as the missing heritability problem in plants and animals (Brachi et  
761 al. 2011; López-Cortegano and Caballero 2019).

762       Regarding the self-genotype effects, we detected *GS-OX2* near the  
763 third top-scoring SNP on the first chromosome. GS-OX2 catalyzes the  
764 conversion of methylthioalkyl to methylsulfinylalkyl glucosinolates (Li et al.  
765 2008) and is up-regulated in response to feeding by the larvae of the large  
766 white butterfly (*Pieris brassicae*) (Geiselhardt et al. 2013). On the other

hand, the second top-scoring SNP of the neighbor effects was located near the *BBE16* locus, responsive to methyl jasmonate, a volatile organic chemical that is emitted from damaged tissue and elicits the defense responses of other plants (Reymond and Farmer 1998; van Poecke 2007). However, because none of the associations were significant above a genome-wide Bonferroni threshold, they should be interpreted cautiously. Nearby genes should only be considered candidates, and further work is necessary to confirm that they exert any neighbor effects on herbivory.

#### **Potential limitation**

Despite many improvements, it is more difficult for GWAS to capture rare causal variants than common ones (Lee et al. 2014; Auer and Littre 2015; Bomba et al. 2018). This problem is more severe in neighbor GWAS, because smaller MAFs result in stronger collinearity between the self-genotype effects  $x_i$  and the neighbor genotypic identity  $\sum_{<i,j>}^L x_i x_j^{(s)}$ . Our simulations showed that the rare variants responsible for the neighbor effects might be misclassified as self-effects, though the opposite was not found, i.e., the misclassification of self-signals into neighbor effects could be suppressed. In GWAS, genotype data usually contains minor alleles and possess kinship structures to some extent, making collinearity unavoidable. To anticipate false positive detection of neighbor effects, the significance of variance components and marker effects involving neighbor effects should

789 always be compared using the standard GWAS model.

790           The present neighbor GWAS focused on single-locus effects and  
791 did not incorporate locus-by-locus interactions. Although it is challenging to  
792 integrate all the association tests for epistasis into GWAS (Gondro et al.  
793 2013; Young and Durbin 2014), it is possible that multiple combinations  
794 among different variants govern neighbor effects. For example, neighbor  
795 effects on insect herbivory may occur due to the joint action of  
796 volatile-mediated signaling and the accumulation of secondary metabolites  
797 (Dicke and Baldwin 2010; Erb 2018). The linear mixed model could be  
798 extended as exemplified by the asymmetric neighbor effects; however, we  
799 need to reconcile multiple criteria including the collinearity of explanatory  
800 variables, inflation of *p*-values, and computational costs. Further  
801 customization is warranted when analyzing more complex forms of  
802 neighbor effects.

803

804

## 805 **Conclusion**

806 Based on the newly proposed methodology, we suggest that neighbor effects  
807 are an overlooked source of phenotypic variation in field-grown plants.  
808 GWAS have often been applied to crop plants (Jannink et al. 2010; Hamblin  
809 et al. 2011), where genotypes are known, and individuals are evenly  
810 transplanted in space. Considering this outlook for agriculture, we provided

811 an example of neighbor GWAS across a lattice space in this study. However,  
812 wild plant populations sometimes exhibit more complex spatial patterns  
813 than those expected by the Ising model (e.g., Kizaki and Katori 1999;  
814 Schlicht and Iwasa 2004). In the rNeighborGWAS package, we allowed  
815 neighbor GWAS for a continuous two-dimensional space. While its  
816 application has now been limited to experimental populations, neighbor  
817 GWAS has the potential for compatibility with the emerging discipline of  
818 landscape genomics (Bragg et al. 2015). In this context, the additional R  
819 package could help future studies to test self and neighbor effects using a  
820 wide variety of plant species.

821 Neighbor GWAS may also have the potential to help determine  
822 optimal spatial arrangements for plant cultivation, as suggested by the post  
823 hoc simulation. Genome-wide polymorphism data are useful not only for  
824 identifying causal variants in GWAS, but also for predicting the breeding  
825 values of crop plants for genomic selection (e.g., Jannink et al. 2010;  
826 Hamblin et al. 2011; Yamamoto et al. 2017). Given that the neighbor GWAS  
827 consists of a marker-based regression, this methodology could also be  
828 expanded as a genomic selection tool to help predict population-level  
829 phenotypes in spatially structured environments.

830

## 831 **ACKNOWLEDGEMENTS**

832 The authors would like to thank Ü. Seren, A. Korte, and M. Nordborg for

833 kindly providing the full imputed SNP data prior to it being publicly  
834 available; T. Tsuchimatsu, K. Iwayama, and J. Bascombe for discussions;  
835 and Dynacom Co., Ltd. for technical assistance with the R package  
836 development. This study was supported by the Japan Science and  
837 Technology Agency (JST) PRESTO (Grant number, JPMJPR17Q4 and  
838 JPMJPR16Q9) to Y.S. and E.Y.; Japan Society for the Promotion of Science  
839 (JSPS) Postdoctoral Fellowship (16J30005) to Y.S.; MEXT KAKENHI  
840 (18H04785) and the Swiss National Science Foundation to K.K.S.; URPP  
841 Global Change and Biodiversity of the University of Zurich to Y.S. and  
842 K.S.S.; and JST CREST (JPMJCR15O2 and JPMJCR16O3) to A.J.N. and  
843 K.K.S. The field experiment was supported by the Joint Usage/Research  
844 Grant of Center for Ecological Research, Kyoto University, Japan.

845

#### 846 **CONFLICT OF INTEREST**

847 The authors declare no conflict of interest.

848

#### 849 **DATA ARCHIVING**

850 The leaf damage data on *A. thaliana* are included in the supporting  
851 information (Table S1). The simulation code and R script used in this study  
852 are available at the GitHub repository  
853 (<https://github.com/naganolab/NeighborGWAS>). R package version of the  
854 neighbor GWAS method is available at CRAN

(<https://cran.r-project.org/package=rNeighborGWAS>).

856

857

## 858 REFERENCES

859 Alonso-Blanco C, Andrade J, Becker C, Bemm F, Bergelson J, Borgwardt

860 KM et al. (2016) 1,135 genomes reveal the global pattern of polymorphism

861 in *Arabidopsis thaliana*. *Cell* **166**: 481–491. doi:10.1016/j.cell.2016.05.063

862 Aranzana MJ, Kim S, Zhao K, Bakker E, Horton M, Jakob K et al. (2005)

863 Genome-wide association mapping in *Arabidopsis* identifies previously

864 known flowering time and pathogen resistance genes. *PLoS Genet* **1**: e60.

865 doi: 10.1371/journal.pgen.0010060

866 Auer PL, Lettre G (2015) Rare variant association studies: considerations,

867 challenges and opportunities. *Genome Med* **7**: 16. doi:

868 10.1186/s13073-015-0138-2

869 Atwell S, Huang YS, Vilhjálmsson BJ, Willems G, Horton M, Li Y et al.

870 (2010) Genome-wide association study of 107 phenotypes in *Arabidopsis*

871 *thaliana* inbred lines. *Nature* **465**: 627–631. doi:10.1038/nature08800

872 Azaele S, Muneeppeerakul R, Rinaldo A, Rodriguez-Iturbe I (2010) Inferring

873 plant ecosystem organization from species occurrences. *J Theor Biol* **262**:

874 323–329. doi:10.1016/j.jtbi.2009.09.026

875 Barbosa P, Hines J, Kaplan I, Martinson H, Szczepaniec A, Szendrei Z

876 (2009) Associational resistance and associational susceptibility: Having



877 right or wrong neighbors. *Ann Rev Ecol Evol Sys* **40**: 1–20.  
878 doi:10.1146/annurev.ecolsys.110308.120242

879 Bergvall UA, Rautio P, Kesti K, Tuomi J, Leimar O (2006) Associational  
880 effects of plant defences in relation to within- and between-patch food  
881 choice by a mammalian herbivore: neighbour contrast susceptibility and  
882 defence. *Oecologia* **147**: 253–260. doi:10.1007/s00442-005-0260-8

883 Bomba L, Walter K, Soranzo N (2017) The impact of rare and  
884 low-frequency genetic variants in common disease. *Genome Biol* **18**: 77.  
885 doi: 10.1186/s13059-017-1212-4

886 Brachi B, Morris GP, Borevitz JO (2011) Genome-wide association studies  
887 in plants: the missing heritability is in the field. *Genome Biol* **12**: 232. doi:  
888 10.1186/gb-2011-12-10-232

889 Brachi B, Meyer CG, Villoutreix R, Platt A, Morton TC, Roux F, Bergelson  
890 J (2015) Coselected genes determine adaptive variation in herbivore  
891 resistance throughout the native range of *Arabidopsis thaliana*. *Proc Natl*  
892 *Acad Sci USA* **112**: 4032–4037. doi:10.1073/pnas.1421416112

893 Bragg JG, Supple MA, Andrew RL, Borevitz JO (2015) Genomic variation  
894 across landscapes: insights and applications. *New Phytol* **207**: 953–967.

895 Browning BL, Browning SR (2009) A unified approach to genotype  
896 imputation and haplotype-phase inference for large data sets of trios and  
897 unrelated individuals. *Am J Hum Genet* **84**: 210–223.  
898 doi:10.1016/j.ajhg.2009.01.005

899 Carlson M (2018) GO.db: A set of annotation maps describing the entire  
900 Gene Ontology. R package version 3.7.0. doi:10.18129/B9.bioc.GO.db

901 Carrasco LR, Harwood TD, Toepfer S, MacLeod A, Levay N, Kiss J et al.  
902 (2010) Dispersal kernels of the invasive alien western corn rootworm and  
903 the effectiveness of buffer zones in eradication programmes in Europe. *Ann*  
904 *Appl Biol* **156**: 63–77. doi:10.1111/j.1744-7348.2009.00363.x

905 Chan EKF, Rowe HC, Kliebenstein DJ (2010) Understanding the evolution  
906 of defense metabolites in *Arabidopsis thaliana* using genome-wide  
907 association mapping. *Genetics* **185**: 991–1007.  
908 doi:10.1534/genetics.109.108522

909 Dahlin I, Rubene D, Glinwood R, Ninkovic V (2018) Pest suppression in  
910 cultivar mixtures is influenced by neighbor-specific plant-plant  
911 communication. *Ecol Appl* **28**: 2187–2196. doi:10.1002/eap.1807

912 Devaux C, Lavigne C, Austerlitz F, Klein EK (2007) Modelling and  
913 estimating pollen movement in oilseed rape (*Brassica napus*) at the  
914 landscape scale using genetic markers. *Mol Ecol* **16**: 487–499.  
915 doi:10.1111/j.1365-294X.2006.03155.x

916 Devoto A, Ellis C, Magusin A, Chang HS, Chilcott C, Zhu T, Turner JG  
917 (2005) Expression profiling reveals *COII* to be a key regulator of genes  
918 involved in wound- and methyl jasmonate-induced secondary metabolism,  
919 defence, and hormone interactions. *Plant Mol Biol* **58**: 497–513.  
920 doi:10.1007/s11103-005-7306-5

- 921 Dicke M, Baldwin IT (2010) The evolutionary context for
- 922 herbivore-induced plant volatiles: beyond the ‘cry for help’. *Trends Plant*
- 923 *Sci* **15**: 167–175. doi:10.1016/j.tplants.2009.12.002
- 924 Erb M (2018) Volatiles as inducers and suppressors of plant defense and
- 925 immunity - origins, specificity, perception and signaling. *Curr Opin Plant*
- 926 *Biol* **44**: 117–121. doi:10.1016/j.pbi.2018.03.008
- 927 Frachon L, Mayjonade B, Bartoli C, Hautekèete NC, Roux F (2019)
- 928 Adaptation to plant communities across the genome of *Arabidopsis thaliana*.
- 929 *Mol Biol Evol* **36**: 1442–1456. doi:10.1093/molbev/msz078
- 930 Gage JL, De Leon N, Clayton MK (2018) Comparing genome-wide
- 931 association study results from different measurements of an underlying
- 932 phenotype. *G3: Genes, Genomes, Genetics* **8**: 3715–3722.
- 933 doi:10.1534/g3.118.200700
- 934 Geiselhardt S, Yoneya K, Blenn B, Drechsler N, Gershenzon J, Kunze R,
- 935 Hilker M (2013) Egg laying of cabbage white butterfly (*Pieris brassicae*) on
- 936 *Arabidopsis thaliana* affects subsequent performance of the larvae. *PLoS*
- 937 *ONE* **8**: e59661. doi:10.1371/journal.pone.0059661
- 938 Gondro C, van der Werf J, Hayes B (eds.) (2013) Genome-wide association
- 939 studies and genomic prediction. *Methods Mol Biol*. Humana Press, New
- 940 York. doi:10.1007/978-1-62703-447-0
- 941 Hambäck PA, Björkman M, Rämert B, Hopkins RJ (2009). Scale-dependent
- 942 responses in cabbage herbivores affect attack rates in spatially

943 heterogeneous systems. *Basic Appl Ecol* **10**: 228–236.  
 944 doi:10.1016/j.baae.2008.06.004

945 Hambäck PA, Inouye BD, Andersson P, Underwood N (2014) Effects of  
 946 plant neighborhoods on plant-herbivore interactions: resource dilution and  
 947 associational effects. *Ecology* **95**: 1370–1383. doi:10.1890/13-0793.1

948 Hamblin MT, Buckler ES, Jannink JL (2011) Population genetics of  
 949 genomics-based crop improvement methods. *Trends Genet* **27**: 98–106.  
 950 doi:10.1016/j.tig.2010.12.003

951 Hauser MT, Harr B, Schlötterer C (2001) Trichome distribution in  
 952 *Arabidopsis thaliana* and its close relative *Arabidopsis lyrata*: molecular  
 953 analysis of the candidate gene *GLABROUS1*. *Mol Biol Evol* **18**: 1754–1763.  
 954 doi:10.1093/oxfordjournals.molbev.a003963

955 Horton MW, Hancock AM, Huang YS, Toomajian C, Atwell S, Auton A et  
 956 al. (2012) Genome-wide patterns of genetic variation in worldwide  
 957 *Arabidopsis thaliana* accessions from the RegMap panel. *Nat Genet* **44**:  
 958 212–216. doi:10.1038/ng.1042

959 Horton MW, Bodenhausen N, Beilsmith K, Meng D, Muegge BD,  
 960 Subramanian S et al. (2014) Genome-wide association study of *Arabidopsis*  
 961 *thaliana* leaf microbial community. *Nat Commun* **5**: 5320.  
 962 doi:10.1038/ncomms6320

963 Ida TY, Takanashi K, Tamura M, Ozawa R, Nakashima Y, Ohgushi T (2018)  
 964 Defensive chemicals of neighboring plants limit visits of herbivorous

965 insects: Associational resistance within a plant population. *Ecol Evol* **8**:  
966 12981–12990. doi:10.1002/ece3.4750

967 Ising E (1925) Beitrag zur theorie des ferromagnetismus. *Zeitschrift für*  
968 *Physik* **31**: 253–258.

969 Jannink JL, Lorenz AJ, Iwata H (2010) Genomic selection in plant breeding:  
970 from theory to practice. *Brief Funct Genomic* **9**: 166–177.  
971 doi:10.1093/bfpg/elq001

972 Kang HM, Zaitlen NA, Wade CM, Kirby A, Heckerman D, Daly MJ, Eskin  
973 E (2008) Efficient control of population structure in model organism  
974 association mapping. *Genetics* **178**: 1709–1723.  
975 doi:10.1534/genetics.107.080101

976 Karban R (1992) Plant variation: its effects on populations of herbivorous  
977 insects. In: Fritz RS, Simms EL (eds) *Plant resistance to herbivores and*  
978 *pathogens: ecology, evolution, and genetics*, University of Chicago Press:  
979 Chicago, pp. 195–215.

980 Kizaki S, Katori M (1999) Analysis of canopy-gap structures of forests by  
981 Ising-Gibbs states-equilibrium and scaling property of real forests. *J Phys*  
982 *Soc Japan* **68**: 2553-2560. doi:10.1143/JPSJ.68.2553

983 Kofler R, Schlotterer C (2012) Gowinda: unbiased analysis of gene set  
984 enrichment for genome-wide association studies. *Bioinformatics* **28**: 2084–  
985 2085. doi:10.1093/bioinformatics/bts315

986 Korte A, Farlow A (2013) The advantages and limitations of trait analysis

987 with GWAS: a review. *Plant Methods* **9**: 29. doi:10.1186/1746-4811-9-29

988 Lee S, Abecasis GR, Boehnke M, Lin X (2014) Rare-variant association

989 analysis: study designs and statistical tests. *Am J Hum Genet* **95**: 5–23. doi:

990 10.1016/j.ajhg.2014.06.009

991 Li J, Hansen BG, Ober JA, Kliebenstein DJ, Halkier BA (2008) Subclade of

992 flavin-monooxygenases involved in aliphatic glucosinolate biosynthesis.

993 *Plant Physiol* **148**: 1721–1733. doi:10.1104/pp.108.125757

994 López-Cortegano E, Caballero A (2019) Inferring the nature of missing

995 heritability in human traits using data from the GWAS catalog. *Genetics*

996 **212**: 891–904. doi: 10.1534/genetics.119.302077

997 McCoy BM, Maillard JM (2012) The importance of the Ising model.

998 *Progress Theor Phys* **127**: 791-817. doi:10.1143/PTP.127.791

999 Mundt CC (2002) Use of multiline cultivars and cultivar mixtures for

1000 disease management. *Ann Rev Phytopathol* **40**: 381-410.

1001 doi:10.1146/annurev.phyto.40.011402.113723

1002 Nallu S, Hill JA, Don K, Sahagun C, Zhang W, Meslin C et al. (2018) The

1003 molecular genetic basis of herbivory between butterflies and their host

1004 plants. *Nat Ecol Evol* **2**: 1418-1427. doi:10.1038/s41559-018-0629-9

1005 Perdry H, Dandine-Roulland C (2018) gaston: Genetic Data Handling (QC,

1006 GRM, LD, PCA) & Linear Mixed Models. R package version 1.5.4.

1007 <https://CRAN.R-project.org/package=gaston>

1008 R Core Team (2019) R: A language and environment for statistical

1009 computing. R Foundation for Statistical Computing, Vienna, Austria.

1010 <https://www.R-project.org/>

1011 Reymond P, Farmer EE (1998) Jasmonate and salicylate as global signals

1012 for defense gene expression. *Curr Opin Plant Biol* **1**: 404–411.

1013 doi:10.1016/s1369-5266(98)80264-1

1014 Rieux A, Soubeyrand S, Bonnot F, Klein EK, Ngando JE, Mehl A et al.

1015 (2014) Long-distance wind-dispersal of spores in a fungal plant pathogen:

1016 estimation of anisotropic dispersal kernels from an extensive field

1017 experiment. *PLoS ONE* **9**: e103225. doi:10.1371/journal.pone.0103225

1018 Robin X, Turck N, Hainard A, Tiberti N, Lisacek F, Sanchez JC, Muller M

1019 (2011) pROC: an open-source package for R and S+ to analyze and compare

1020 ROC curves. *BMC Bioinformatics* **12**: 77. doi:10.1186/1471-2105-12-77

1021 Sato Y (2018) Associational effects and the maintenance of polymorphism

1022 in plant defense against herbivores: review and evidence. *Plant Species Biol*

1023 **33**: 91–108. doi:10.1111/1442-1984.12201

1024 Sato Y, Kudoh H (2015) Tests of associational defence provided by hairy

1025 plants for glabrous plants of *Arabidopsis halleri* subsp. *gemmaifera* against

1026 insect herbivores. *Ecol Entomol* **40**: 269–279. doi:10.1111/een.12179

1027 Sato Y, Kudoh H (2017) Herbivore-mediated interaction promotes the

1028 maintenance of trichome dimorphism through negative

1029 frequency-dependent selection. *Am Nat* **190**: E67–E77. doi:10.1086/692603

1030 Sato Y, Ito K, Kudoh H (2017) Optimal foraging by herbivores maintains

- 1031 polymorphism in defence in a natural plant population. *Funct Ecol* **31**:  
1032 2233–2243. doi:10.1111/1365-2435.12937
- 1033 Sato Y, Shimizu-Inatsugi R, Yamazaki M, Shimizu KK, Nagano AJ (2019)  
1034 Plant trichomes and a single gene *GLABRA1* contribute to insect community  
1035 composition on field-grown *Arabidopsis thaliana*. *BMC Plant Biol* **19**: 163.  
1036 doi:10.1186/s12870-019-1705-2
- 1037 Schlicht R, Iwasa Y (2004) Forest gap dynamics and the Ising model. *J*  
1038 *Theoret Biol* **230**: 65–75. doi:10.1016/j.jtbi.2004.04.027
- 1039 Schuman MC, Allmann S, Baldwin IT (2015) Plant defense phenotypes  
1040 determine the consequences of volatile emission for individuals and  
1041 neighbors. *eLife* **4**: e04490. doi:10.7554/eLife.04490
- 1042 Tahvanainen JO, Root RB (1972) The influence of vegetational diversity on  
1043 the population ecology of a specialized herbivore, *Phyllotreta cruciferae*  
1044 (Coleoptera: Chrysomelidae). *Oecologia* **10**: 321–346.  
1045 doi:10.1007/BF00345736
- 1046 Schrauf MF, Martini JWR, Simianer H, De los Campos G, Cantet R,  
1047 Freudenthal J et al. (2020) Phantom epistasis in genomic selection: on the  
1048 predictive ability of epistatic models. *G3: Genes, Genomes, Genetics* **10**:  
1049 3137–3145. doi:10.1534/g3.120.401300
- 1050 Seren Ü, Grimm D, Fitz J, Weigel D, Nordborg M, Borgwardt K, Korte A  
1051 (2017) AraPheno: a public database for *Arabidopsis thaliana* phenotypes.  
1052 *Nucleic Acids Res* **45**: D1054–D1059. doi:10.1093/nar/gkw986



1053 Togninalli M, Seren Ü, Meng D, Fitz J, Nordborg M, Weigel D et al. (2018)  
 1054 The AraGWAS Catalog: a curated and standardized *Arabidopsis thaliana*  
 1055 GWAS catalog. *Nucleic Acids Res* **46**: D1150–D1156.  
 1056 doi:10.1093/nar/gkx954  
 1057 Underwood N, Rausher MD (2000) The effects of host-plant genotype on  
 1058 herbivore population dynamics. *Ecology* **81**: 1565-1576.  
 1059 doi:10.1890/0012-9658(2000)081[1565:TEOHPG]2.0.CO;2  
 1060 Underwood N, Inouye BD, Hambäck PA (2014) A conceptual framework  
 1061 for associational effects: when do neighbors matter and how would we  
 1062 know? *Quart Rev Biol* **89**: 1–19. doi:10.1086/674991  
 1063 Underwood N, Hambäck PA, Inouye BD (2020) Pollinators, herbivores, and  
 1064 plant neighborhood effects. *Quart Review Biol* **95**: 37–57.  
 1065 doi:10.1086/707863  
 1066 Utsumi S, Ando Y, Craig TP, Ohgushi T (2011) Plant genotypic diversity  
 1067 increases population size of a herbivorous insect. *Proc Royal Soc B* **278**:  
 1068 3108–3115. doi:10.1098/rspb.2011.0239  
 1069 van Poecke RM (2007) Arabidopsis-insect interactions. *The Arabidopsis*  
 1070 *Book* **5**: e0107. doi:10.1199/tab.0107  
 1071 Verschut TA, Becher PG, Anderson P, Hambäck PA (2016) Disentangling  
 1072 associational effects: both resource density and resource frequency affect  
 1073 search behaviour in complex environments. *Funct Ecol* **30**: 1826-1833.  
 1074 doi:10.1111/1365-2435.12670

1075 Wang M, Roux F, Bartoli C, Huard-Chauveau C, Meyer C, Lee H et al.  
1076 (2018) Two-way mixed-effects methods for joint association analysis using  
1077 both host and pathogen genomes. *Proc Natl Acad Sci USA* **115**: E5440–  
1078 E5449. doi:10.1073/pnas.1710980115

1079 Weiner J (1990) Asymmetric competition in plant populations. *Trends Ecol*  
1080 *Evol* **5**: 360-364. doi:10.1016/0169-5347(90)90095-U

1081 Yamamoto E, Matsunaga H, Onogi A, Ohyama A, Miyatake K, Yamaguchi  
1082 H et al. (2017) Efficiency of genomic selection for breeding population  
1083 design and phenotype prediction in tomato. *Heredity* **118**: 202–209.  
1084 doi:10.1038/hdy.2016.84

1085 Young AI, Durbin R (2014) Estimation of epistatic variance components and  
1086 heritability in founder populations and crosses. *Genetics* **198**: 1405–1416.  
1087 doi: 10.1534/genetics.114.170795

1088 Zeller SL, Kalinina O, Flynn DFB, Schmid B (2012) Mixtures of  
1089 genetically modified wheat lines outperform monocultures. *Ecol Appl* **22**:  
1090 1817–1826. doi:10.1890/11-0876.1

1091 Zhou X, Stephens M (2012) Genome-wide efficient mixed-model analysis  
1092 for association studies. *Nat Genet* **44**: 821–824.

1093 Zuk O, Hechter E, Sunyaev SR, Lander ES (2012) The mystery of missing  
1094 heritability: Genetic interactions create phantom heritability. *Proc Natl Acad*  
1095 *Sci USA* **109**: 1193–1198. doi: 10.1073/pnas.1119675109

1096

## 1097 **Tables and Figures**

1098

1099 **Table 1.** Factors affecting variance estimation and causal variant detection  
 1100 in the simulated phenotypes. The accuracy of the proportion of the  
 1101 phenotypic variation explained (PVE) was defined as the PVE accuracy =  
 1102 (estimated total PVE – true total PVE) / true total PVE. The power was  
 1103 represented by the area under the ROC curve (AUC). The sensitivity to  
 1104 detect self or neighbor effects was evaluated using the true positive rate of  
 1105 the ROC curve, when the false positive rate = 0.05. The accuracy of the  
 1106 effect size estimates were evaluated using the mean absolute errors (MAE)  
 1107 between the true and estimated fixed effects. ANOVA tables show the  
 1108 degree of freedom (df), sum of squares (SS), *F*-statistics, and *p*-values.  
 1109 Explanatory factors are the number of causal SNPs, proportion of  
 1110 phenotypic variation explained (PVE) by major-effect genes ( $PVE_{\beta}$ ), total  
 1111 PVE by major-effect genes and variance components ( $PVE_{\beta} + PVE_u$ ),  
 1112 relative contribution of self, symmetric, and asymmetric neighbor effects  
 1113 ( $PVE_{self}:PVE_{nei}:PVE_{sxn}$ ), and distance decay coefficient  $\alpha$ . For the neighbor  
 1114 effects, the difference of the reference spatial scales ( $s = 1 - 3$ ) was also  
 1115 considered an explanatory variable. NA means not available.

| Response            | Factors                          | df   | SS     | F      | p-value   |
|---------------------|----------------------------------|------|--------|--------|-----------|
| PVE accuracy        | No. of causal SNPs               | 1    | 0.00   | 0.0    | 0.954     |
|                     | $PVE_{\beta}$                    | 1    | 0.01   | 0.6    | 0.439     |
|                     | $PVE_{\beta} + PVE_u$            | 1    | 0.02   | 0.61   | 0.433     |
|                     | $PVE_{self}:PVE_{nei}:PVE_{sxn}$ | 2    | 0.25   | 4.95   | 0.007     |
|                     | $\alpha$                         | 1    | 0.96   | 38.46  | 6.1e-10   |
|                     | $s$                              | 1    | 8.49   | 341.0  | < 2.2e-16 |
|                     | <i>Residuals</i>                 | 4312 | 107.34 | NA     | NA        |
| AUC <sub>self</sub> | No. of causal SNPs               | 1    | 13.12  | 2998.6 | < 2e-16   |
|                     | $PVE_{\beta}$                    | 1    | 0.77   | 176.6  | < 2e-16   |
|                     | $PVE_{\beta} + PVE_u$            | 1    | 0.02   | 4.04   | 0.045     |
|                     | $PVE_{self}:PVE_{nei}:PVE_{sxn}$ | 2    | 8.08   | 923.54 | < 2e-16   |
|                     | $\alpha$                         | 1    | 0.01   | 2.19   | 0.139     |

|                      |                                                                   |      |        |         |           |
|----------------------|-------------------------------------------------------------------|------|--------|---------|-----------|
|                      | <i>Residuals</i>                                                  | 1073 | 4.69   | NA      | NA        |
| AUC <sub>nei</sub>   | No. of causal SNPs                                                | 1    | 25.82  | 2225.1  | < 2.2e-16 |
|                      | PVE <sub><math>\beta</math></sub>                                 | 1    | 2.30   | 198.1   | < 2.2e-16 |
|                      | PVE <sub><math>\beta</math></sub> + PVE <sub><math>u</math></sub> | 1    | 0.03   | 2.24    | 0.135     |
|                      | PVE <sub>self</sub> :PVE <sub>nei</sub> :PVE <sub>sxn</sub>       | 2    | 20.97  | 903.48  | < 2.2e-16 |
|                      | $\alpha$                                                          | 1    | 0.96   | 83.00   | < 2.2e-16 |
|                      | $s$                                                               | 1    | 0.079  | 6.83    | 0.0090    |
|                      | <i>Residuals</i>                                                  | 3232 | 37.50  | NA      | NA        |
| Self sensitivity     | No. of causal SNPs                                                | 1    | 74.204 | 1317.15 | < 2.2e-16 |
|                      | PVE <sub><math>\beta</math></sub>                                 | 1    | 2.236  | 39.69   | 4.0e-10   |
|                      | PVE <sub><math>\beta</math></sub> + PVE <sub><math>u</math></sub> | 1    | 0.06   | 1.06    | 0.30      |
|                      | PVE <sub>self</sub> :PVE <sub>nei</sub> :PVE <sub>sxn</sub>       | 2    | 11.955 | 106.10  | < 2.2e-16 |
|                      | $\alpha$                                                          | 1    | 0.089  | 1.57    | 0.21      |
|                      | <i>Residuals</i>                                                  | 1073 | 60.449 | NA      | NA        |
|                      | <i>Residuals</i>                                                  | 3232 | 274.72 | NA      | NA        |
| Neighbor sensitivity | No. of causal SNPs                                                | 1    | 98.052 | 1153.56 | < 2.2e-16 |
|                      | PVE <sub><math>\beta</math></sub>                                 | 1    | 4.649  | 54.70   | 2.0e-13   |
|                      | PVE <sub><math>\beta</math></sub> + PVE <sub><math>u</math></sub> | 1    | 0.016  | 0.19    | 0.67      |
|                      | PVE <sub>self</sub> :PVE <sub>nei</sub> :PVE <sub>sxn</sub>       | 2    | 23.196 | 136.45  | < 2.2e-16 |
|                      | $\alpha$                                                          | 1    | 1.852  | 21.79   | 3.0e-06   |
|                      | $s$                                                               | 1    | 0.096  | 1.13    | 0.29      |
|                      | <i>Residuals</i>                                                  | 3232 | 274.72 | NA      | NA        |
| MAE <sub>self</sub>  | No. of causal SNPs                                                | 1    | 105.32 | 323.44  | < 2e-16   |
|                      | PVE <sub><math>\beta</math></sub>                                 | 1    | 1.80   | 5.54    | 0.02      |
|                      | PVE <sub><math>\beta</math></sub> + PVE <sub><math>u</math></sub> | 1    | 0.14   | 0.44    | 0.51      |
|                      | PVE <sub>self</sub> :PVE <sub>nei</sub> :PVE <sub>sxn</sub>       | 2    | 36.11  | 55.45   | < 2e-16   |
|                      | $\alpha$                                                          | 1    | 0.73   | 2.23    | 0.14      |
|                      | <i>Residuals</i>                                                  | 1073 | 349.41 | NA      | NA        |
|                      | <i>Residuals</i>                                                  | 3232 | 585.91 | NA      | NA        |
| MAE <sub>nei</sub>   | No. of causal SNPs                                                | 1    | 2.73   | 15.06   | 1.0e-04   |
|                      | PVE <sub><math>\beta</math></sub>                                 | 1    | 16.89  | 93.17   | < 2.2e-16 |
|                      | PVE <sub><math>\beta</math></sub> + PVE <sub><math>u</math></sub> | 1    | 3.51   | 19.34   | 1.0e-05   |
|                      | PVE <sub>self</sub> :PVE <sub>nei</sub> :PVE <sub>sxn</sub>       | 2    | 80.22  | 221.25  | < 2.2e-16 |
|                      | $\alpha$                                                          | 1    | 0.39   | 2.15    | 0.14      |
|                      | $s$                                                               | 1    | 45.87  | 253.01  | < 2.2e-16 |
|                      | <i>Residuals</i>                                                  | 3232 | 585.91 | NA      | NA        |

1116

1117

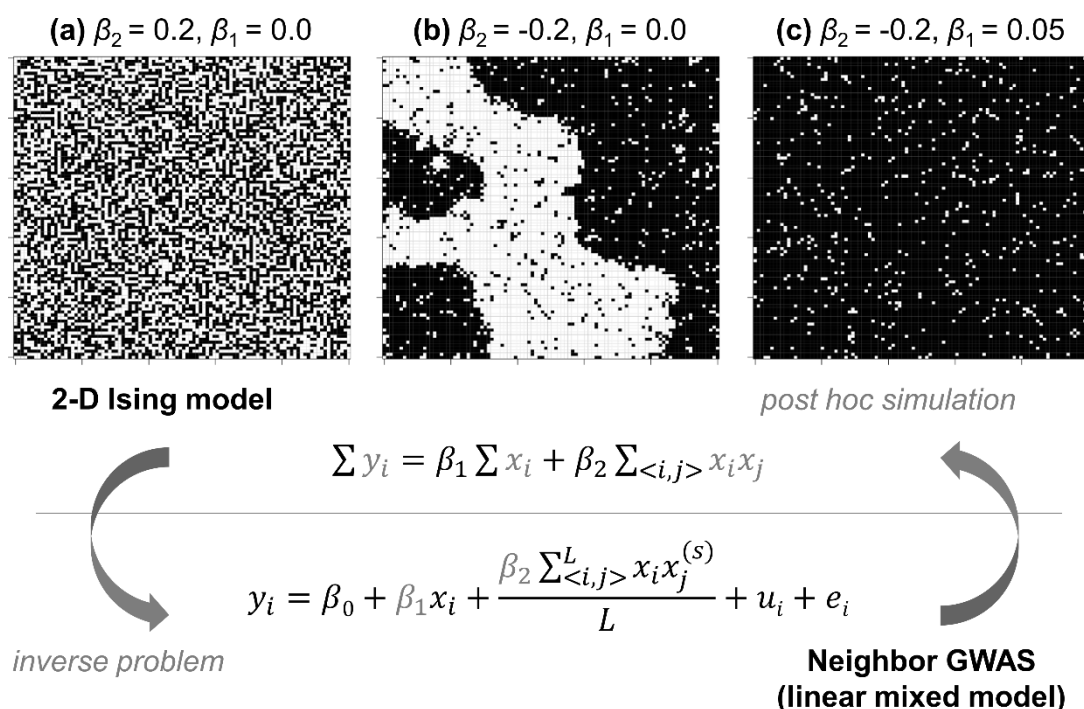

**Figure 1.** Relationship between the neighbor GWAS and Ising model. Upper panels show the spatial arrangements expected by a 2-D Ising model  $\sum y_i = \beta_1 \sum x_i + \beta_2 \sum_{\langle i,j \rangle} x_i x_j$ . (a) If  $\beta_2 > 0$ , mixed patterns give the argument of the minimum for a population sum of phenotype values  $\sum y_i$ . (b) If  $\beta_2 < 0$ , clustered patterns give the argument of the minimum for  $\sum y_i$ . (c) In addition,  $\beta_1$  determines the overall patterns favoring -1 or +1 states. The figures show outcomes from a random  $100 \times 100$  lattice after 1000 iterations of simulated annealing. Conversely, the neighbor GWAS was implemented as an inverse problem of the 2-D Ising model, where genotypes and its spatial arrangement,  $x_i$  and  $x_i x_j$ , were given while the coefficients  $\beta_1$  and  $\beta_2$  were to be estimated from the observed phenotypes  $y_i$ . In addition, the variance component due to self and neighbor effects was considered a random effect in a linear mixed model, such that  $u_i \in \mathbf{u}$  and  $\mathbf{u} \sim \text{Norm}(\mathbf{0}, \sigma_1^2 \mathbf{K}_1 + \sigma_2^2 \mathbf{K}_2)$ . Once  $\beta_1$  and  $\beta_2$  were determined, we could simulate a genotype distribution that maximizes or minimizes  $\sum y_i$ .

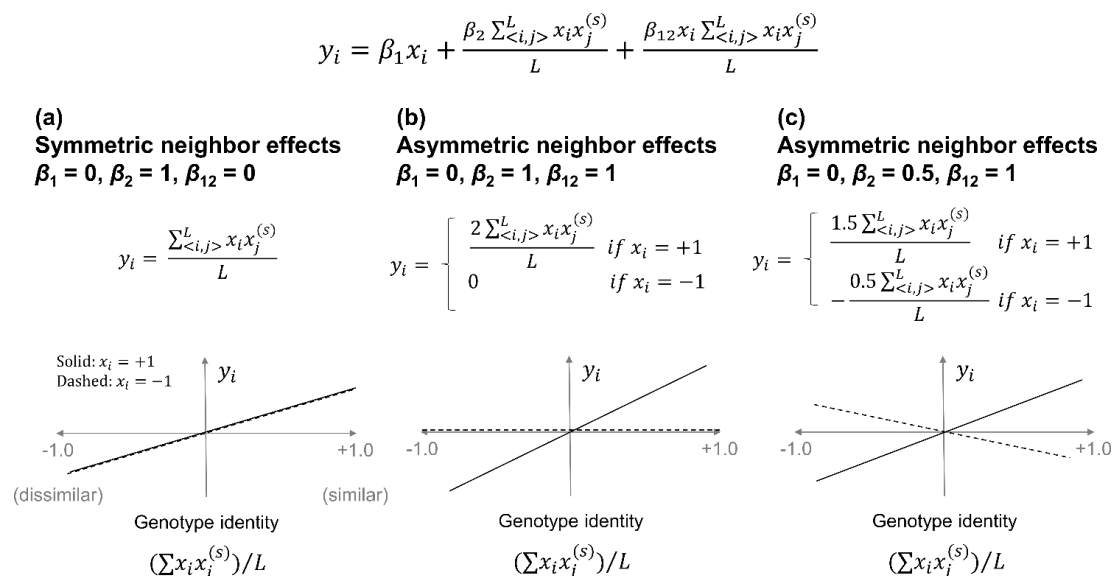

**Figure 2.** Numerical examples of the symmetric (a) and asymmetric (b, c) neighbor effects. The intercept, distance decay, random effects, and residual errors are neglected, to simplify this scheme. (a) Symmetric neighbor effects represent how neighbor genotype similarity (or dissimilarity) affects the trait value of a focal individual  $y_i$  regardless of its own genotype. (b) Asymmetric neighbor effects can represent a case in which one genotype experiences neighbor effects while the other does not (b) and a case in which the direction of the neighbor effects depends on the genotypes of a focal individual (c). The case (b) was considered in our simulation as it has been empirically reported (e.g., Bergvall et al. 2006; Verschut et al. 2016; Sato & Kudoh 2017).

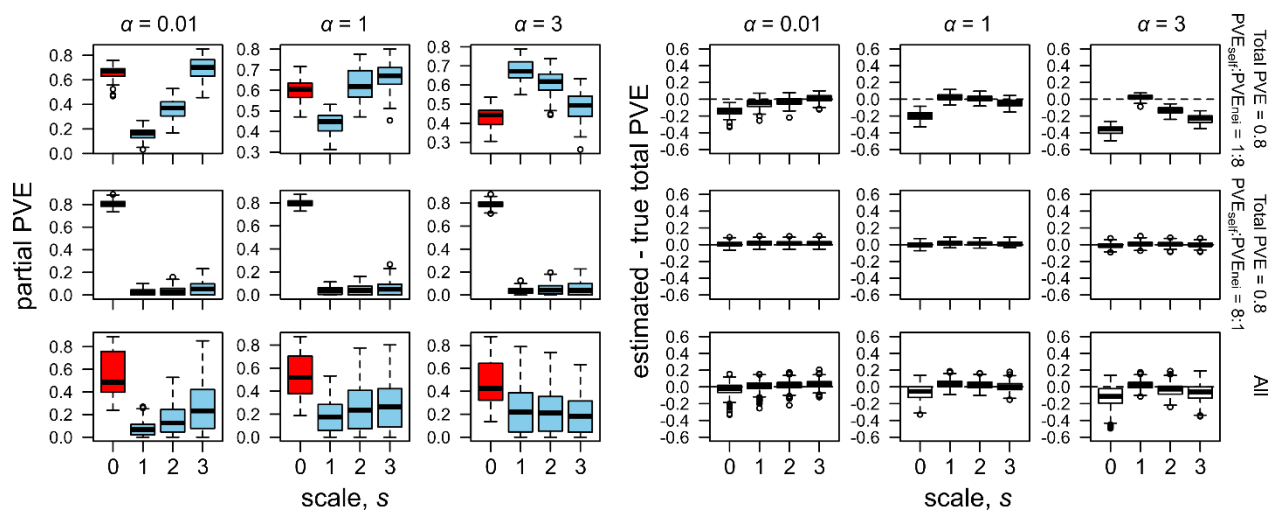

**Figure 3.** Spatial scale dependence of PVE estimates in simulated phenotypes. The broad, intermediate, and narrow effective range of neighbor effects are represented by weak ( $\alpha = 0.01$ ), moderate ( $\alpha = 1$ ), and strong ( $\alpha = 3$ ) distance decay coefficients, respectively. Partial PVE (left) and the accuracy of the total PVE estimation (right) are shown along the spatial scale from the first nearest ( $s = 1$ ) to the third nearest ( $s = 3$ ) neighbors, with distinct relative contributions of the self and neighbor effects to a phenotype ( $\text{PVE}_{\text{self}}:\text{PVE}_{\text{nei}} = 1:8$  or  $8:1$ ). Boxplots show center line: median, box limits: upper and lower quartiles, whiskers:  $1.5 \times$  interquartile range, and points: outliers. In the left panels, red boxes indicate partial  $\text{PVE}_{\text{self}}$  at  $s = 0$  (corresponded to single  $\text{PVE}_{\text{self}}$ ), while blue boxes indicate partial  $\text{PVE}_{\text{nei}}$  at  $s \neq 0$ . In the right panels, horizontal dashed lines indicate a perfect match between the estimated and true total PVE.

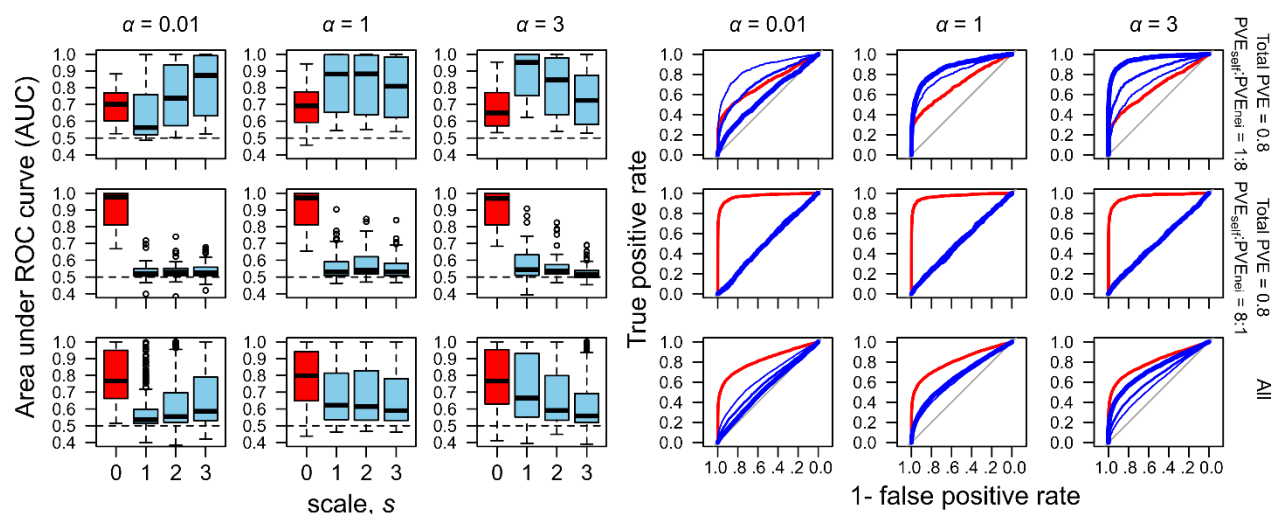

**Figure 4.** Spatial scale dependence of the power to detect causal SNPs in simulated phenotypes. The broad, intermediate, and narrow effective range of neighbor effects are represented by weak ( $\alpha = 0.01$ ), moderate ( $\alpha = 1$ ), and strong ( $\alpha = 3$ ) distance decay coefficients, respectively. Receiver operating characteristic (ROC) curves (right) and the area under the ROC curve (AUC) (left) are shown alongside the spatial scales from the first nearest ( $s = 1$ ) to the third nearest ( $s = 3$ ) neighbors, with the distinct relative contributions of the self and neighbor effects to a phenotype ( $PVE_{\text{self}}:PVE_{\text{nei}} = 1:8$  or  $8:1$ ). Red boxes and curves indicate self-effects, while blue boxes indicate neighbor effects. The thickness of the blue curves indicates reference spatial scales as follows:  $s = 1$  (thick),  $s = 2$  (medium), or  $s = 3$  (thin). The horizontal dashed lines in the left panels indicates that the  $AUC = 0.5$ , i.e., no detection of causal variants. The ROC curves in the right panels are depicted based on ten iterations with 50 causal SNPs.



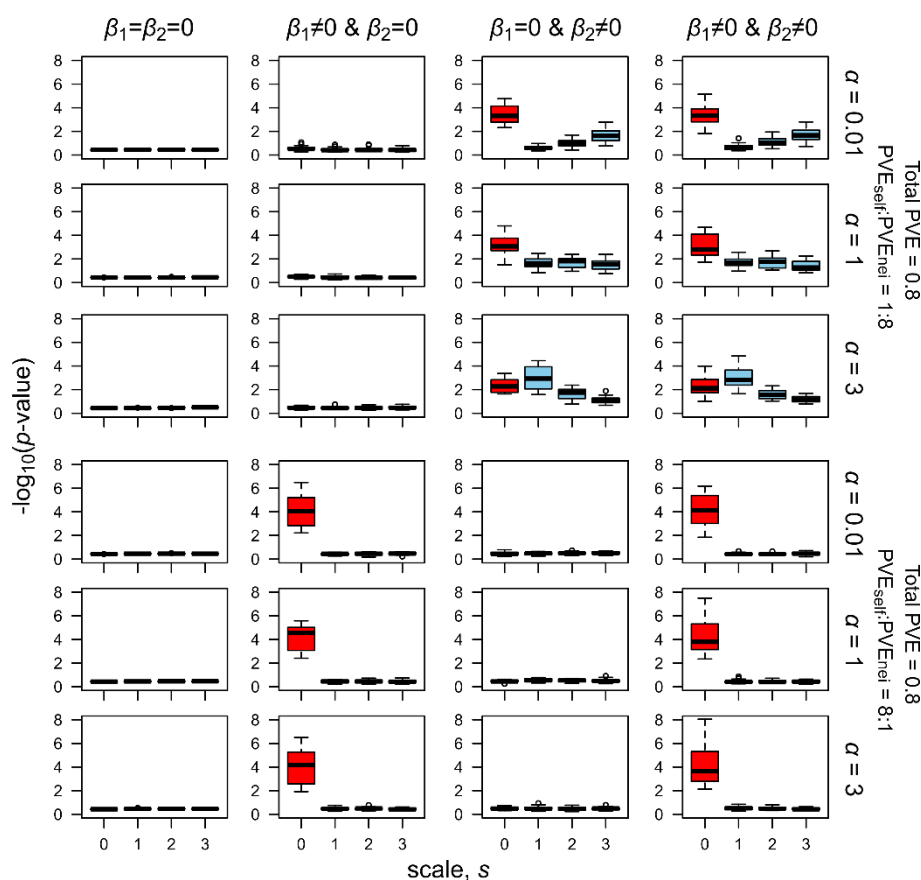

**Figure 5.** Signals of the self and neighbor effects when either the self or neighbor effects were for 50 causal SNPs. The score of  $-\log_{10}(p\text{-value})$  is averaged within each iteration and is shown for the non-causal SNPs ( $\beta_1 = \beta_2 = 0$ ), SNPs responsible for self-effects alone ( $\beta_1 \neq 0$  and  $\beta_2 = 0$ ), SNPs responsible for neighbor effects alone ( $\beta_1 = 0$  and  $\beta_2 \neq 0$ ), and SNPs responsible for both self and neighbor effects ( $\beta_1 \neq 0$  and  $\beta_2 \neq 0$ ). Red and blue boxes show  $-\log_{10}(p\text{-value})$  distributions among the iterations for the self and neighbor effects, respectively.

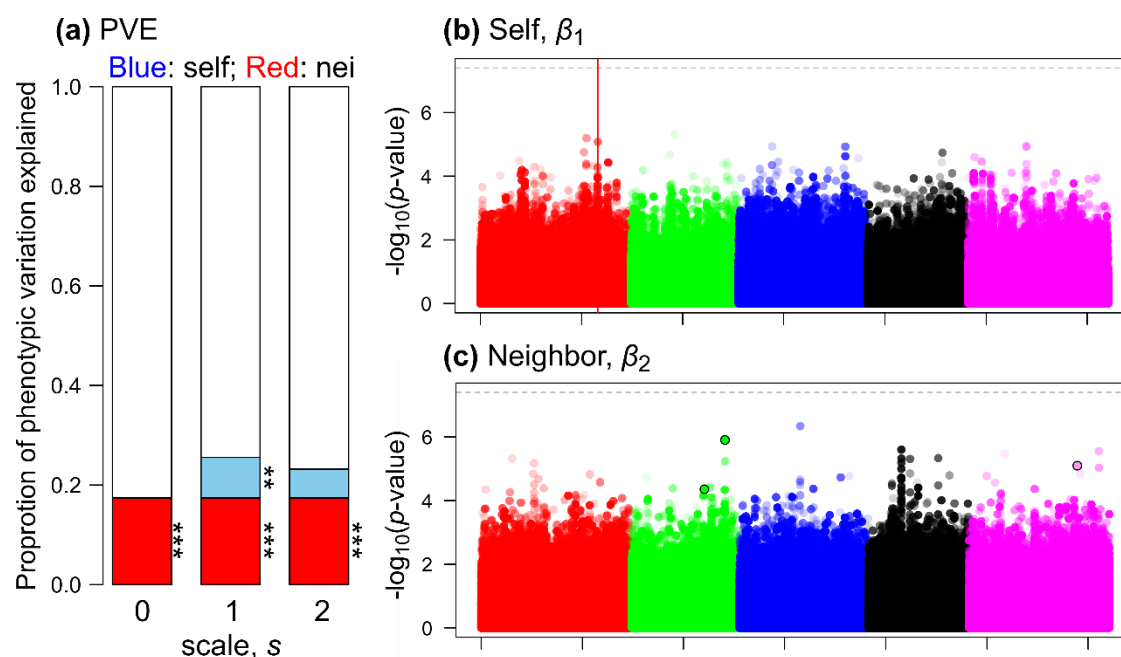

1189

1190 **Figure 6.** Pilot GWAS of leaf damage scores on field-grown *Arabidopsis*  
1191 *thaliana*. (a) Proportion of phenotypic variation explained (PVE) by the  
1192 self-genotype (red) or neighbor effects (blue). The  $PVE_{\text{self}}$  was represented  
1193 by the single  $PVE_{\text{self}}$  that represented additive genetic variance, while the  
1194 net contribution of the neighbor effects was evaluated using the net  $PVE_{\text{nei}} =$   
1195 total PVE – single  $PVE_{\text{self}}$ . Asterisks highlight a significant fraction with  
1196 stepwise likelihood ratio tests, from simpler to complex models: \*\*  $p\text{-value} <$   
1197 0.01; \*\*\*  $p\text{-value} < 0.001$ . (b, c) Manhattan plots for the self or neighbor  
1198 effects. The first to fifth chromosomes are differently colored, where lighter  
1199 plots indicate smaller MAF. Horizontal dashed lines indicate the threshold  
1200 after Bonferroni correction at  $p\text{-value} < 0.05$ . The red vertical line in panel  
1201 (a) indicates an SNP position near the *GS-OX2* locus, while the three circles  
1202 highlighted by a black outline in panel (b) indicates the variants subject to  
1203 the post hoc simulation (Fig. 7). Results of the self and neighbor effects are  
1204 shown at  $s = 0$  (i.e., standard GWAS) and  $s = 1$ , respectively.

1205

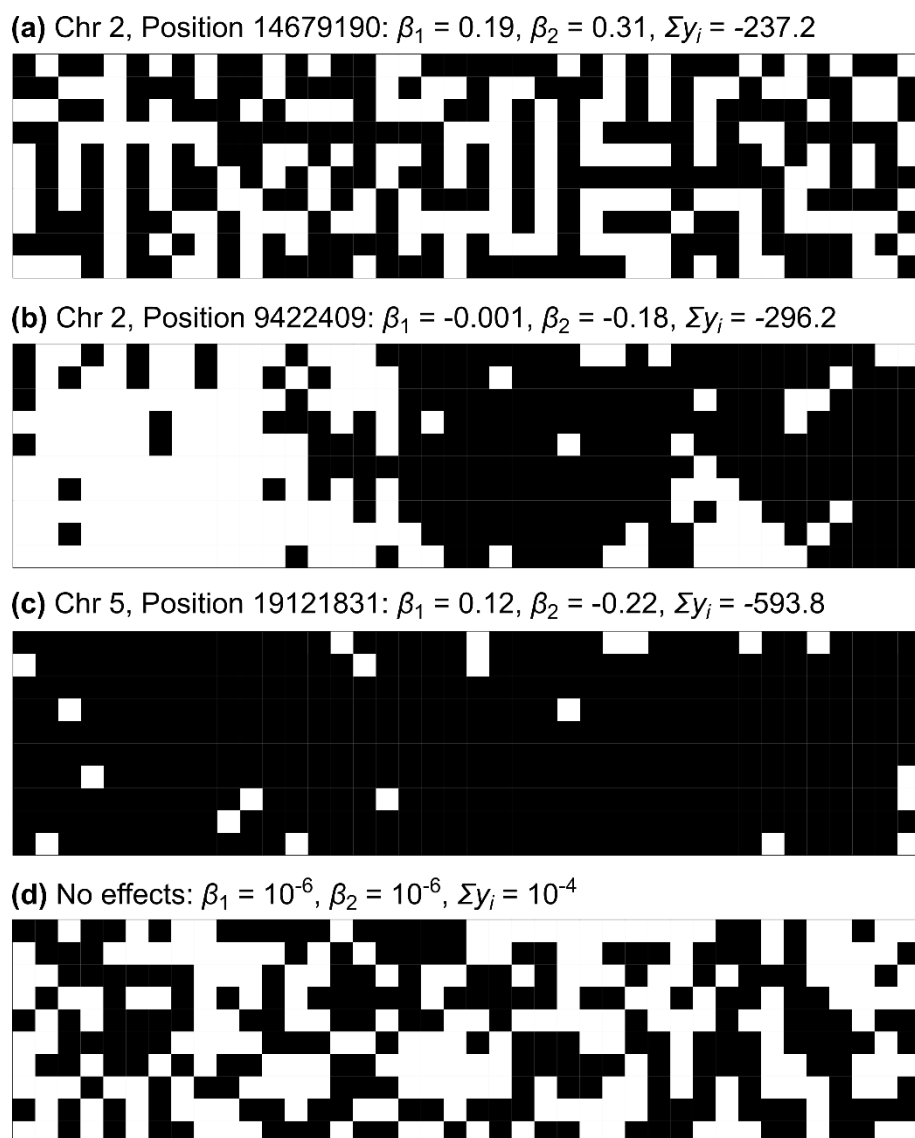

**Figure 7.** Post hoc simulations exemplifying a spatial arrangement of the two alleles expected by the estimated self and neighbor effects,  $\hat{\beta}_1$  and  $\hat{\beta}_2$ , on the leaf damage score of *Arabidopsis thaliana*. The population sum of the leaf damage  $\Sigma y_i = \beta_1 \Sigma x_i + \beta_2 \Sigma_{\langle i,j \rangle} x_i x_j$  was minimized using 1000 iterations of simulated annealing from a random distribution of two alleles in a  $10 \times 40$  space.
